# Supplementary material for: Microwave assisted synthesis of phenanthridinones and dihydrophenanthridines by vasicine/KOtBu promoted intramolecular C–H arylation
Source: Royal Society of Chemistry journal article supplement (doi:10.1039/c6ob01362g), 2016-01-01
Supplement: c6ob01362g1.pdf [file c6ob01362g1.pdf]

## SUPPORTING INFORMATION

# Microwave Assisted Synthesis of Phenanthridinones and Dihydrophenanthridines by Vasicine/KOtBu Promoted Intramolecular C-H Arylation

Sushila Sharma,<sup>a,b</sup> Manoranjan Kumar,<sup>a,b</sup> Shruti Sharma,<sup>a</sup> Onkar S. Nayal,<sup>a,b</sup> Neeraj Kumar,<sup>§</sup> Bikram Singh\* and Upendra Sharma\*

<sup>a</sup>Natural Product Chemistry and Process Development Division, CSIR-Institute of Himalayan Bioresource Technology, Palampur, Himachal Pradesh-176 061, India

<sup>b</sup>Academy of Scientific and Innovative Research, Anusandhan Bhawan, 2 Rafi Marg, New Delhi-110001, India

\*E-mail: [upendra@ihbt.res.in](mailto:upendra@ihbt.res.in) (US); [bikramsingh@ihbt.res.in](mailto:bikramsingh@ihbt.res.in) (BS)

<sup>§</sup> Deceased on 28<sup>th</sup> March 2016

|                                                                                  |            |
|----------------------------------------------------------------------------------|------------|
| <b>General information and reagents.....</b>                                     | <b>S2</b>  |
| <b>Optimization table and other information.....</b>                             | <b>S2</b>  |
| <b>Procedure for mechanistic experiments.....</b>                                | <b>S3</b>  |
| <b><sup>1</sup>H NMR, <sup>13</sup>C NMR spectra for isolated compounds.....</b> | <b>S5</b>  |
| <b>References.....</b>                                                           | <b>S26</b> |

## General information

All reagents, high grade solvents and materials were used as received from commercial sources unless otherwise stated. Toluene was distilled from sodium and benzophenone. Column chromatography was carried out with 100-200 mesh silica gel (Merck India). TLC silica gel 60 F<sub>254</sub> plates and 100-200 mesh silica gel were purchased from Merck India Ltd. 2-Halobenzoic acid, anilines and NMR solvents were purchased from sigma Aldrich. <sup>1</sup>H NMR and <sup>13</sup>C NMR experiments were performed on Bruker Avance-300 and 600 MHz spectrometer. NMR spectra were recorded in CDCl<sub>3</sub>. Chemical shifts are reported in parts per million (ppm) downfield from an internal standard. Splitting patterns are given as follows: s, singlet; d, doublet; t, triplet; q, quartet; m, multiplet; br, broad; brs, broad singlet; dd, double doublet. All coupling constants are given in Hertz (Hz). All experiments were performed on CEM Discover focused microwave (2450 MHz, 300W). The GC-MS analysis was carried out using DB-5 MS capillary column, (30 m x 0.25 mm i.d., 0.25 μm) on a Shimadzu (QP 2010) series Gas Chromatogram-Mass Spectrometer (Tokyo, Japan) coupled with AOC-20i auto-sampler. The initial temperature of column was 70 °C held for 4 min. and was programmed upto 230 °C at 4°C/min., then held for 15 min. at 230 °C; the sample injection volume was 2 μL in GC grade dichloromethane. Nitrogen was used as carrier gas at a flow rate of 1.1 mL min<sup>-1</sup> on split mode (1: 50). Mass spectra were recorded on QTOF-Micro of Waters Micromass.

**Table S1 Optimization of reaction conditions**

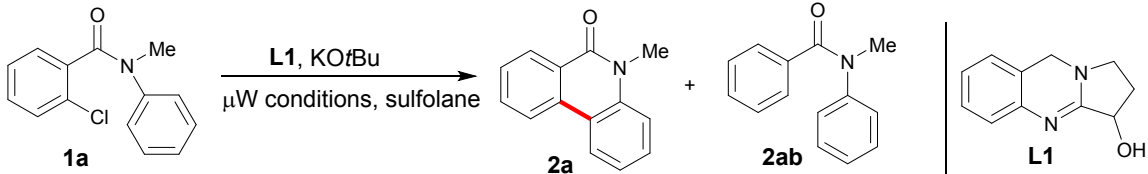

| entry          | catalyst | base  | solvent   | Time (min) | Temperature (°C) | conv (%) | yield (%) <sup>b</sup> |     |
|----------------|----------|-------|-----------|------------|------------------|----------|------------------------|-----|
|                |          |       |           |            |                  |          | 2a                     | 2ab |
| 1              | L1       | KOtBu | Sulfolane | 15         | 80               | 90       | 35                     | 49  |
| 2              | L1       | KOtBu | Sulfolane | 5          | 120              | 92       | 38                     | 48  |
| 3              | L1       | KOtBu | Sulfolane | 10         | 120              | 99       | 45                     | 39  |
| 4              | L1       | KOtBu | Sulfolane | 15         | 150              | 99       | 50                     | 40  |
| 5 <sup>c</sup> | L1       | KOtBu | Sulfolane | 30         | 120              | 99       | 48                     | 30  |

<sup>a</sup> Reaction was carried out with 0.25 mmol of **1a** in the presence of vasicine (50 mol%) and KOtBu (4 equiv) in 0.4 mL of sulfolane under  $\mu$ W. <sup>b</sup> Isolated yield. In most cases dechlorination of **1a** yielding corresponding amide and cleavage of **1a**, yielding *N*-methylaniline was observed. <sup>c</sup> *N*-methylaniline (15%) was observed.

**Table S2: Other tested amines and amides for intramolecular cyclization**

| entry | substrate                                                                         | product                                                                            | Yield (%) |
|-------|-----------------------------------------------------------------------------------|------------------------------------------------------------------------------------|-----------|
| 1     | 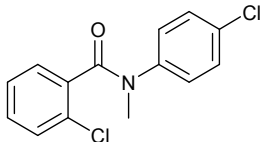 |  | 58        |
| 2     |  | Decomposition was observed                                                         | nd        |
| 3     |  | Decomposition was observed                                                         | traces    |
| 4     |  | Decomposition was observed                                                         | nd        |
| 5     |  |  | 65        |

### Procedure for radical scavenging experiment

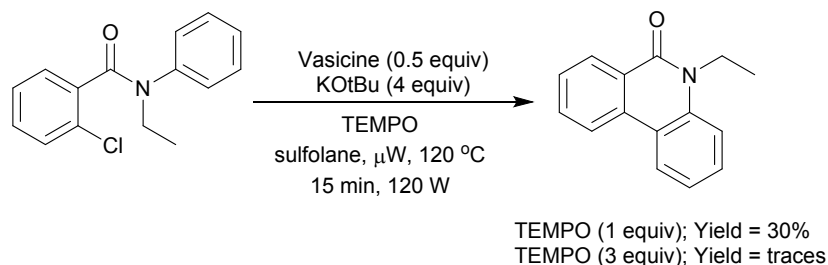

To an oven dried 10 mL glass tube charged with magnetic bar was added 2-chloro-*N*-ethyl-*N*-phenylbenzamide (0.25 mmol), vasicine (0.12 mmol), *KOtBu* (1 mmol), TEMPO (0.25 mmol) and sulfolane (0.4 mL). The tube was sealed with a septum stirred and placed in the microwave and subjected to microwave irradiation of 120 W. The temperature was ramped from rt to 120 °C and held at 120 °C for 15 min. After the reaction, the reaction mixture was allowed to cool and was diluted with ethyl acetate. The organic layer was then washed with water and the solvent was removed under vacuo. The crude residue was subjected to column chromatography on silica gel using *n*-hexane: EtOAc to afford the cyclized product.

Further, same procedure for the reaction of 2-chloro-*N*-ethyl-*N*-phenylbenzamide (0.25 mmol) in the presence of vasicine (0.12 mmol), *KOtBu* (1 mmol), and 3 equivalent of TEMPO (0.75 mmol) in sulfolane yielded the cyclised product in trace amount.

**Procedure for competition reaction between iodo-, bromo- and chloro-substituted amides**

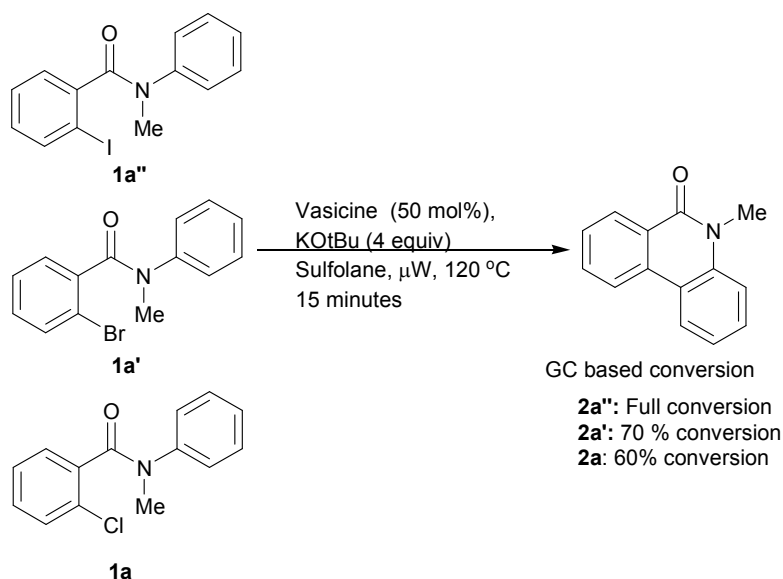

To an oven dried 10 mL glass tube charged with magnetic bar was added 2-iodo-*N*-methyl-*N*-phenylbenzamide (**1a''**, 0.15 mmol), 2-bromo-*N*-methyl-*N*-phenylbenzamide (**1a'**, 0.15 mmol), 2-chloro-*N*-methyl-*N*-phenylbenzamide (**1a**, 0.15 mmol), vasicine (0.075 mmol), KOtBu (0.6 mmol), sulfolane (0.4 mL). The tube was sealed with a septum stirred and placed in the microwave and subjected to microwave irradiation of 120 W. The temperature was ramped from rt to 120 °C and held at 120 °C for 15 min. After the reaction, the reaction mixture was allowed to cool and was diluted with ethyl acetate. The organic layer was then washed with water and the solvent was removed under vacuo. The crude reaction mixture was then analyzed with GC-MS

**Cyclization reaction of 3-chloro-*N*-methyl-*N*-phenylbenzamide:** To an oven dried 10 mL glass tube charged with magnetic bar was added 3-chloro-*N*-methyl-*N*-phenylbenzamide (0.15 mmol), vasicine (0.075 mmol), KOtBu (0.6 mmol) and sulfolane (0.4 mL). The tube was sealed with a septum stirred and placed in the microwave and subjected to microwave irradiation of 120 W. The temperature was ramped from rt to 120 °C and held at 120 °C for 15 min. After the reaction, the reaction mixture was allowed to cool and was diluted with ethyl acetate. The organic layer was then washed with water and the solvent was removed under vacuo. No product formation was observed.

# $^1\text{H}$ and $^{13}\text{C}$ NMR Spectra of isolated compounds

## Vasicine

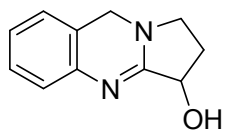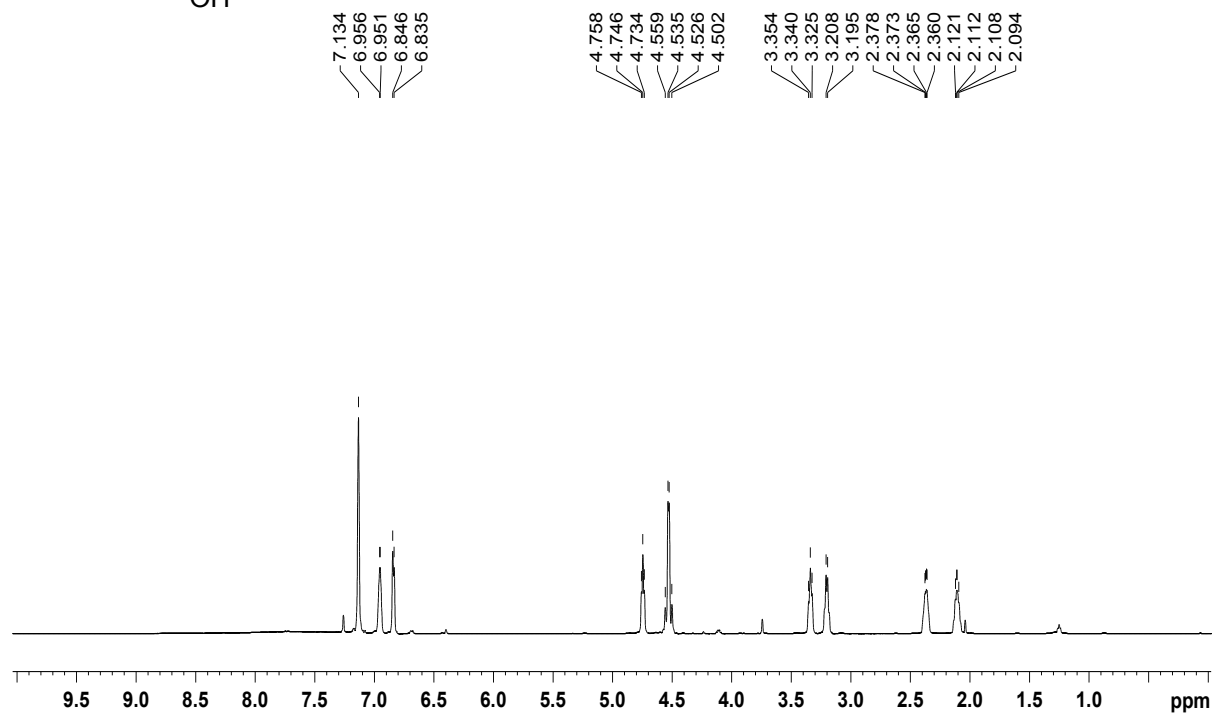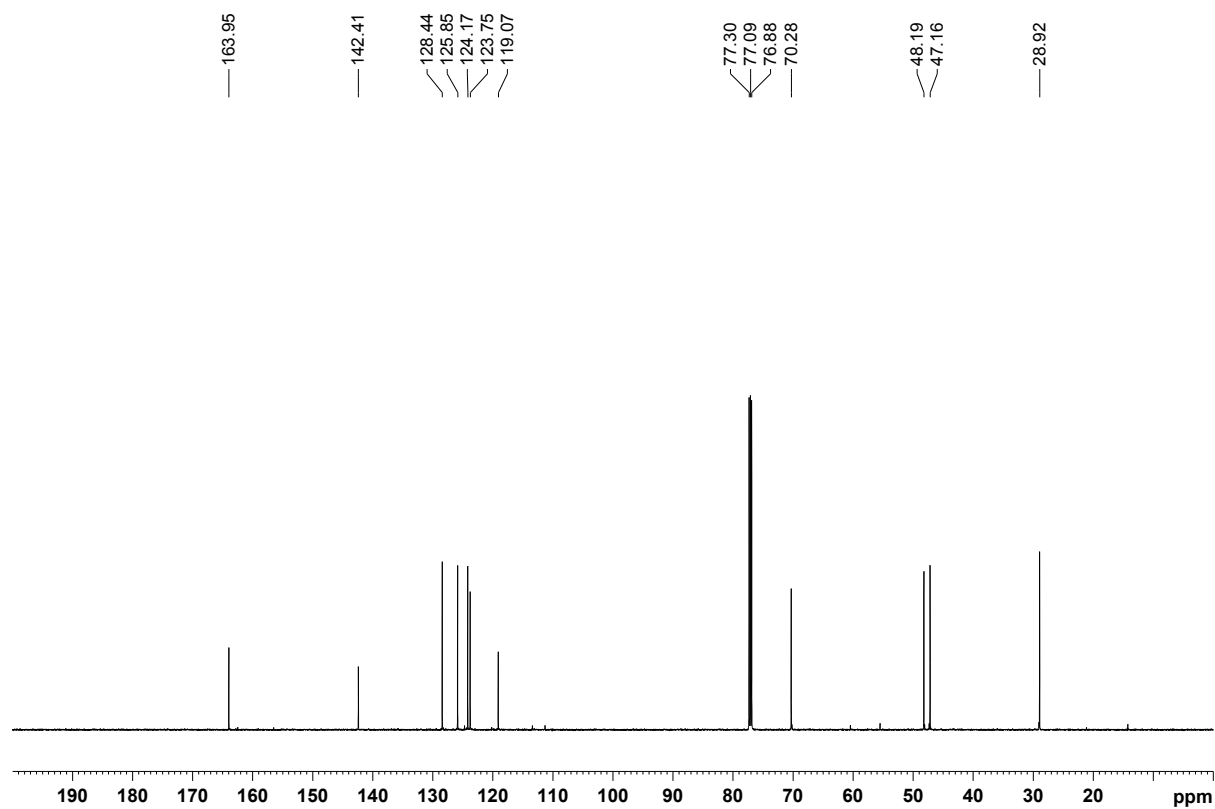

# Vasicinone

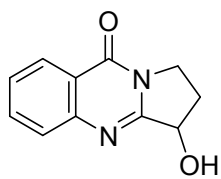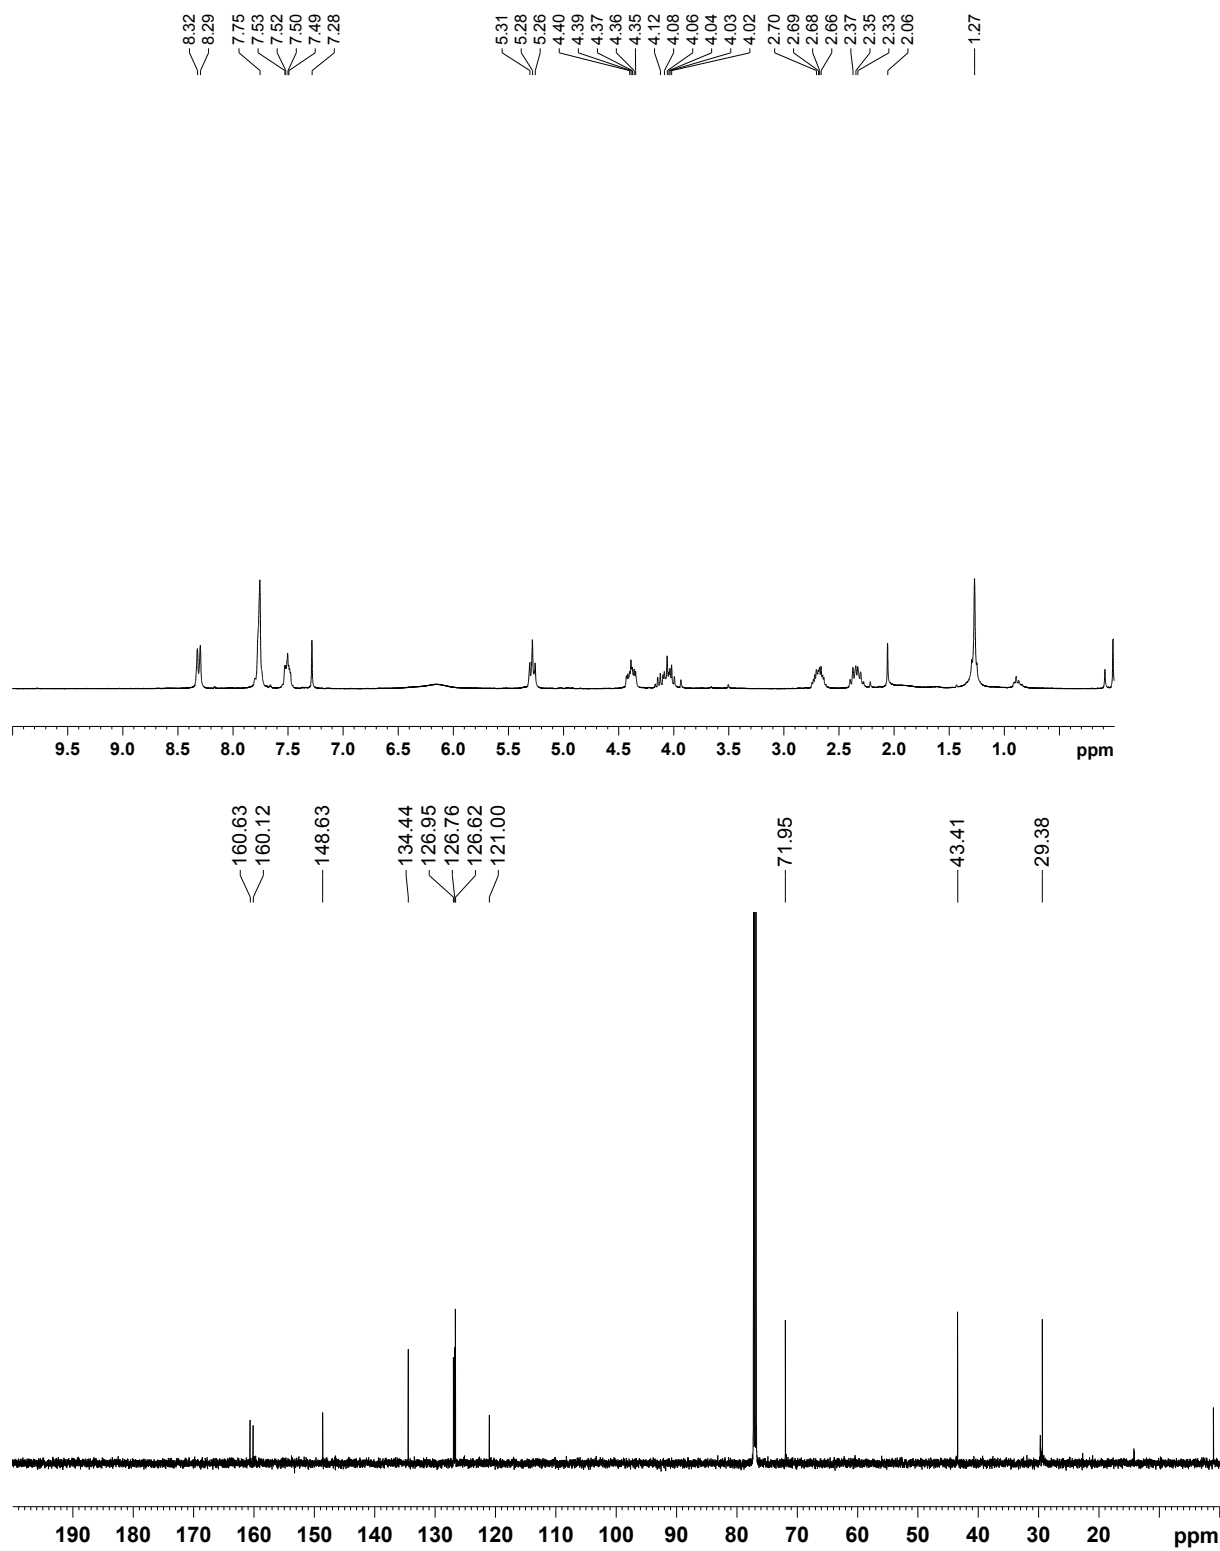

# 5-methylphenanthridin-6(5H)-one (2a)

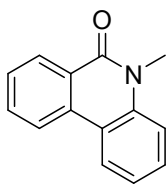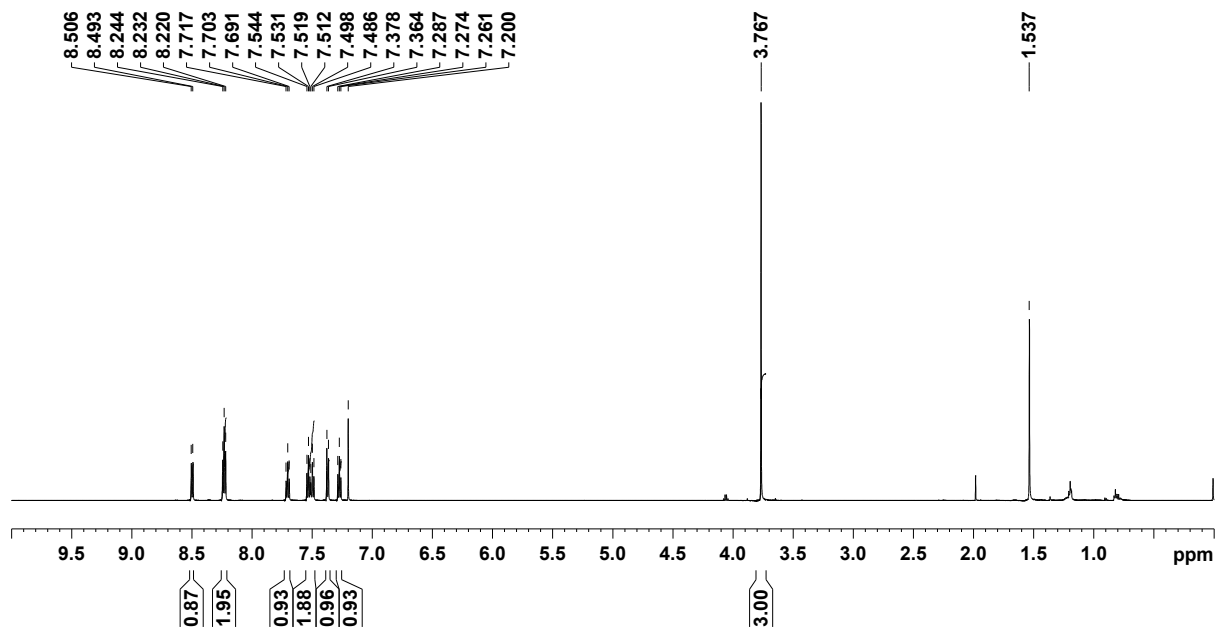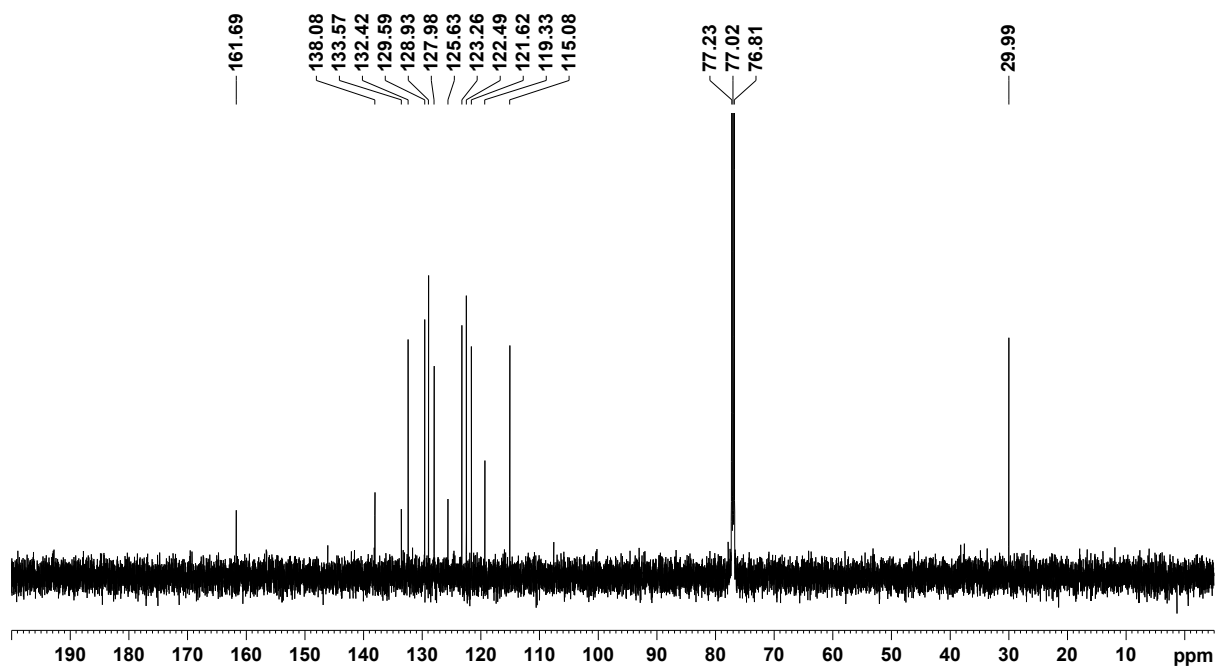

### 3-Fluoro-5-methylphenanthridin-6(5H)-one (2b)

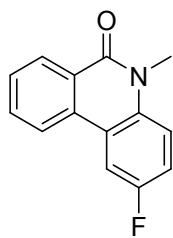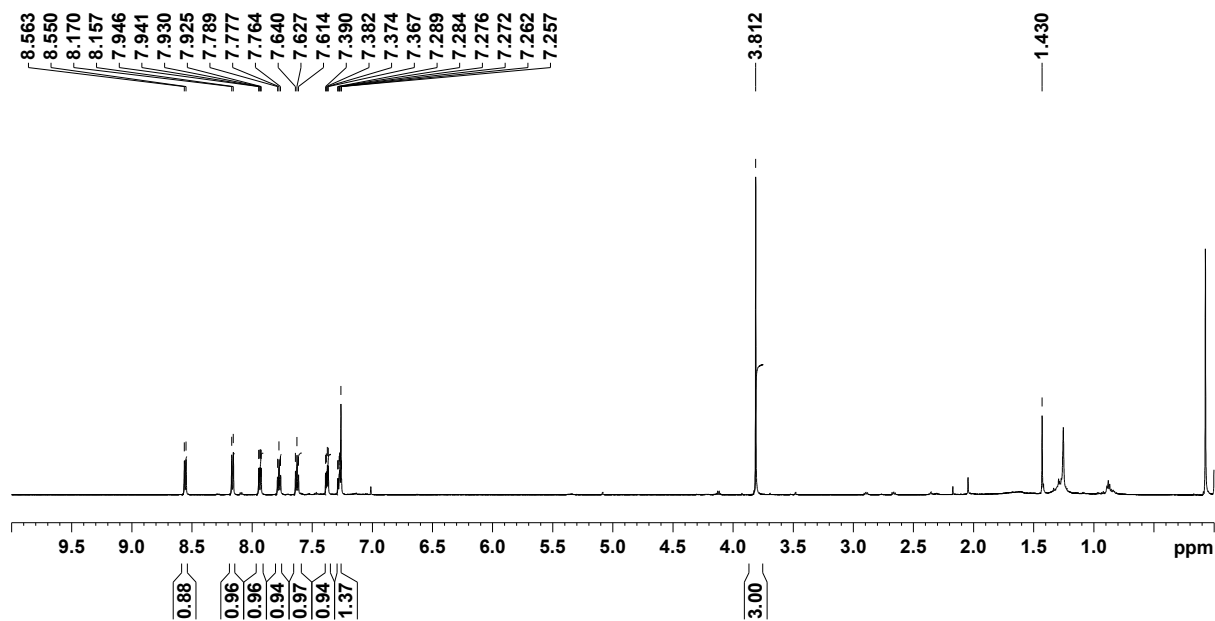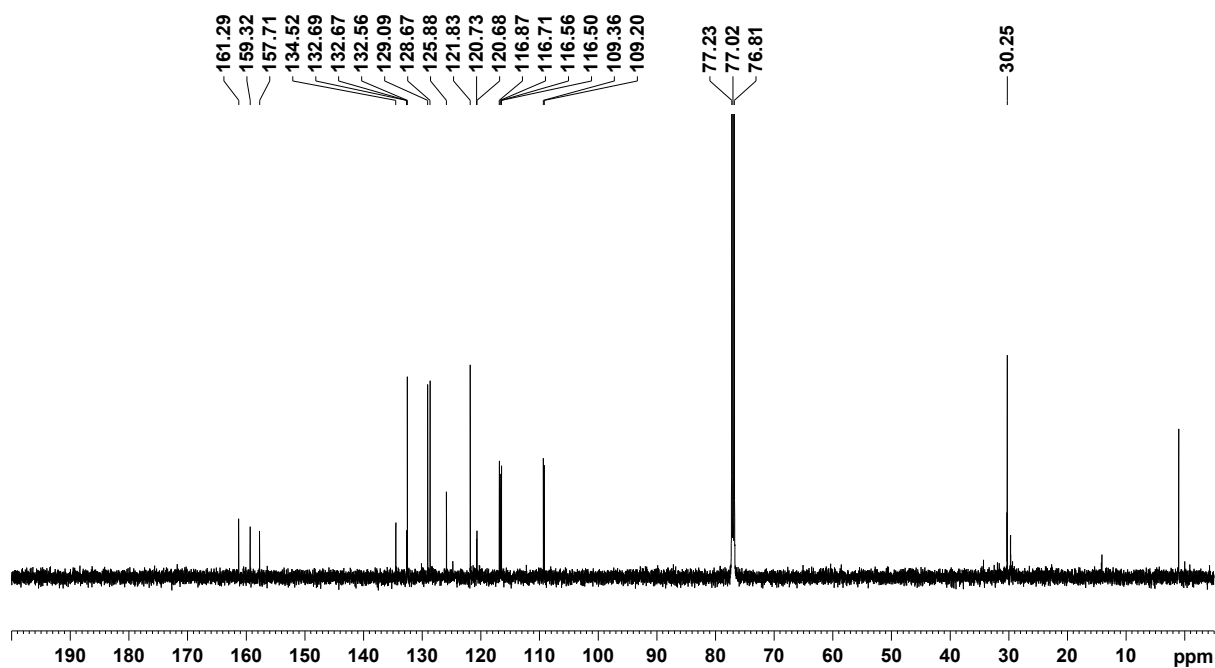



### 3-Methoxy-5-methylphenanthridin-6(5H)-one (2c)

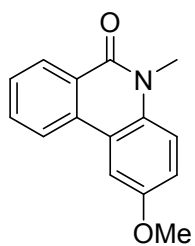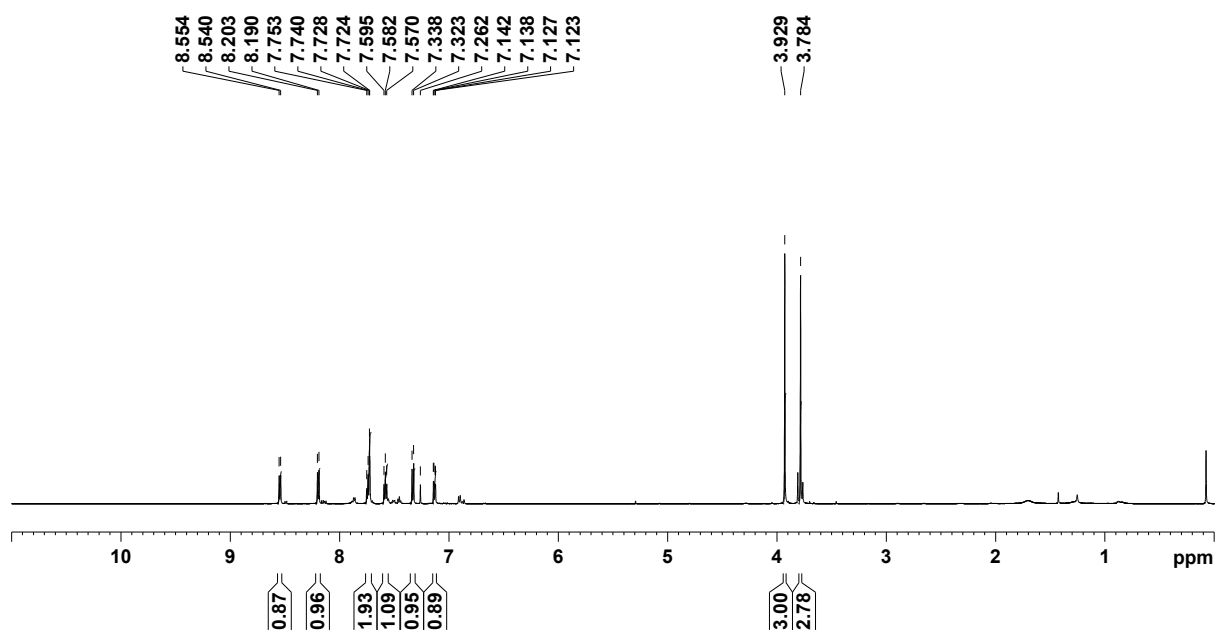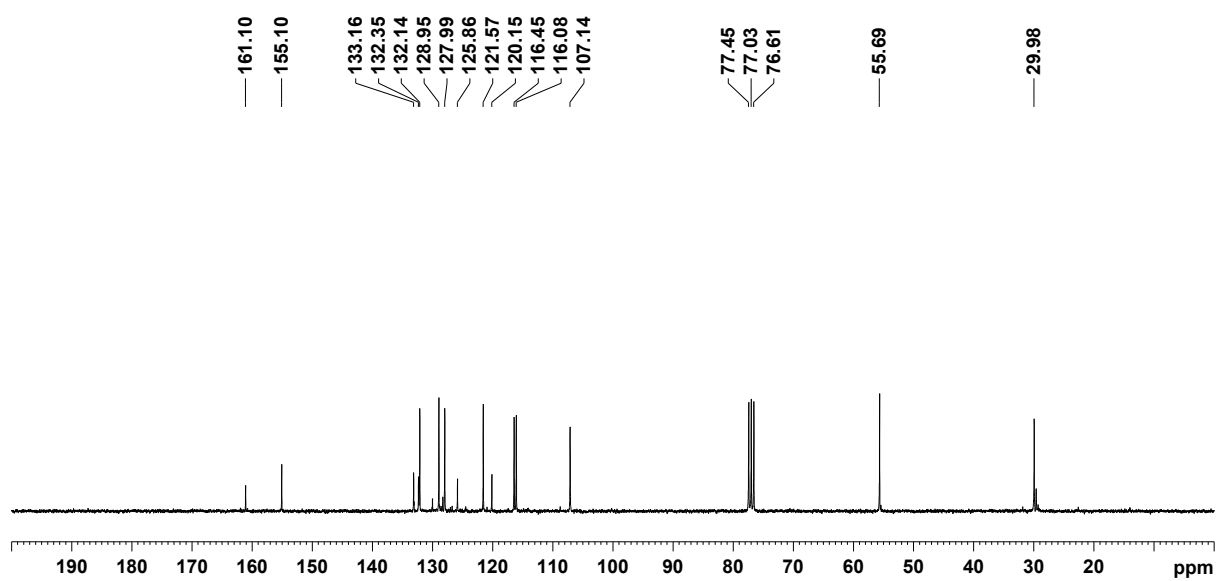

### 3,5-Dimethylphenanthridin-6(5H)-one (2d)

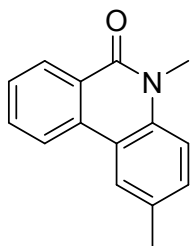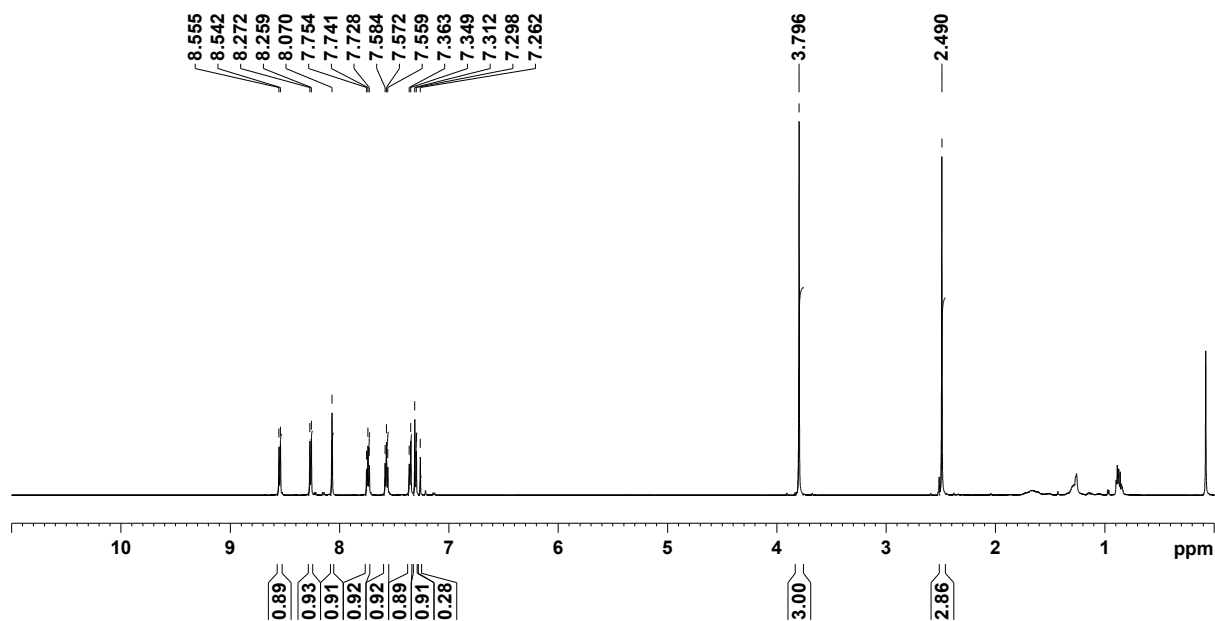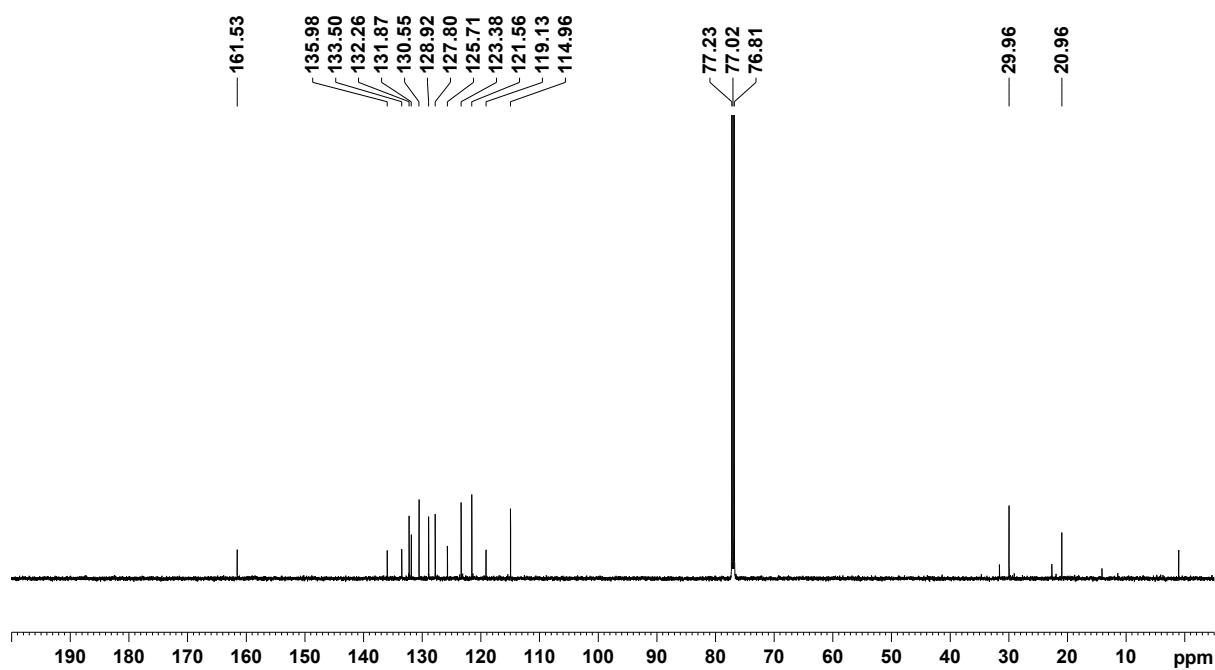

## 2,3-Dimethoxy-5-methylphenanthridin-6(5H)-one (2e)

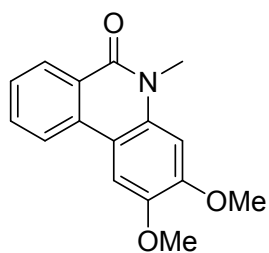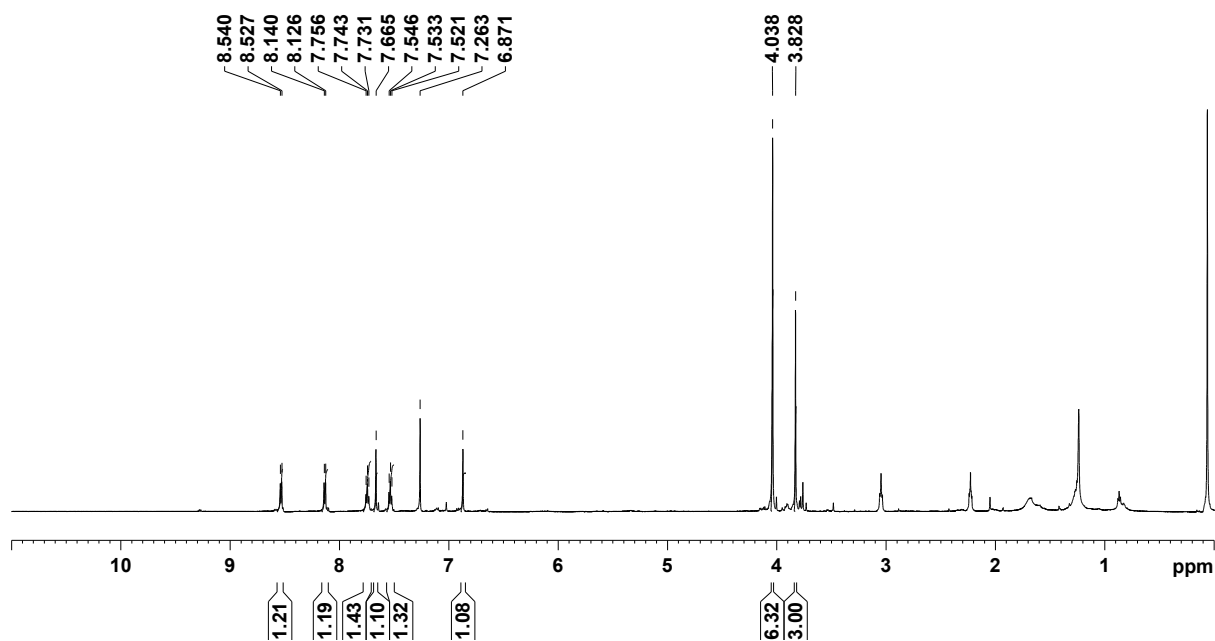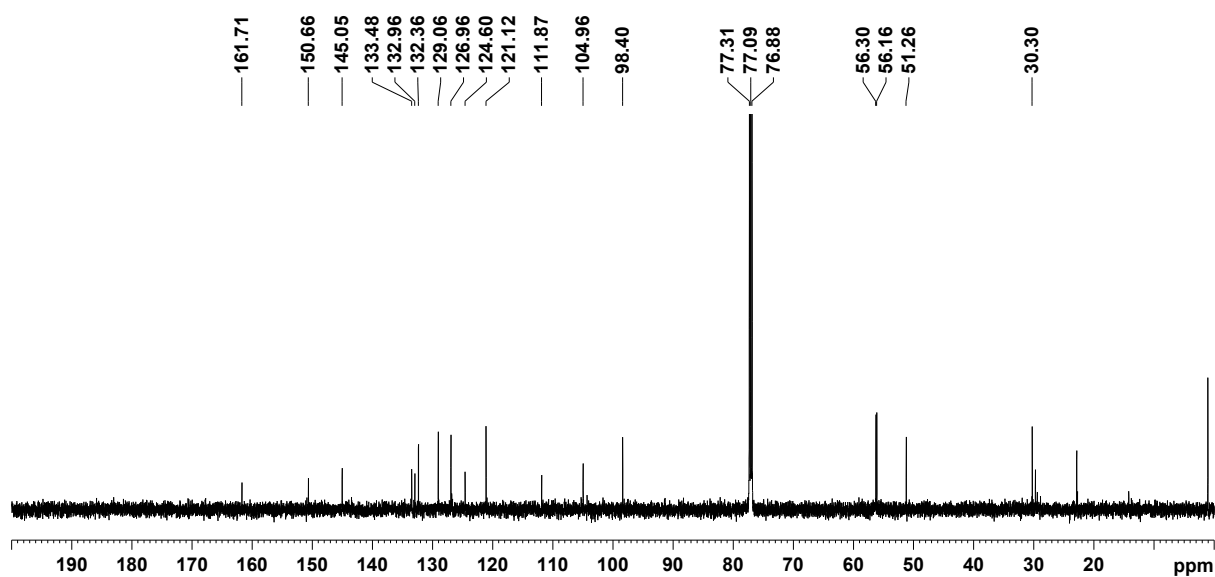

### 9-Amino-5-methylphenanthridin-6(5H)-one (2f)

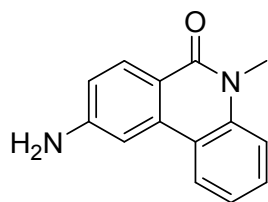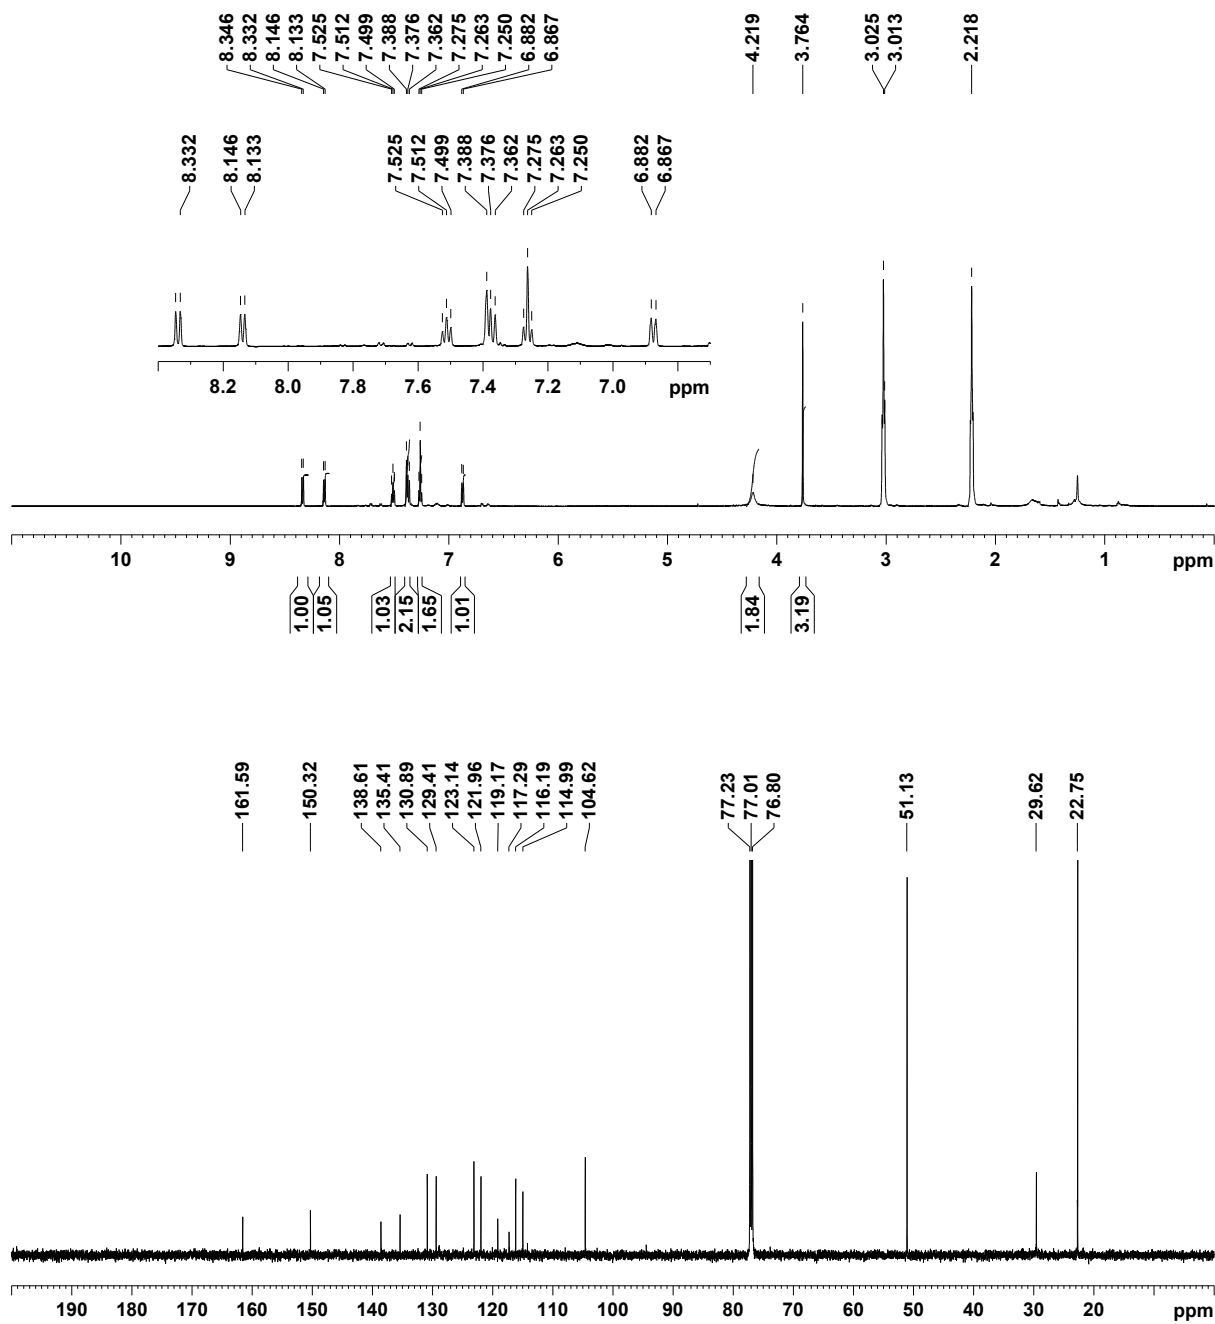

# 8-Methoxy-5-methylphenanthridin-6(5H)-one (2g)

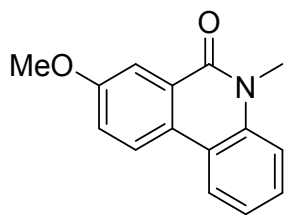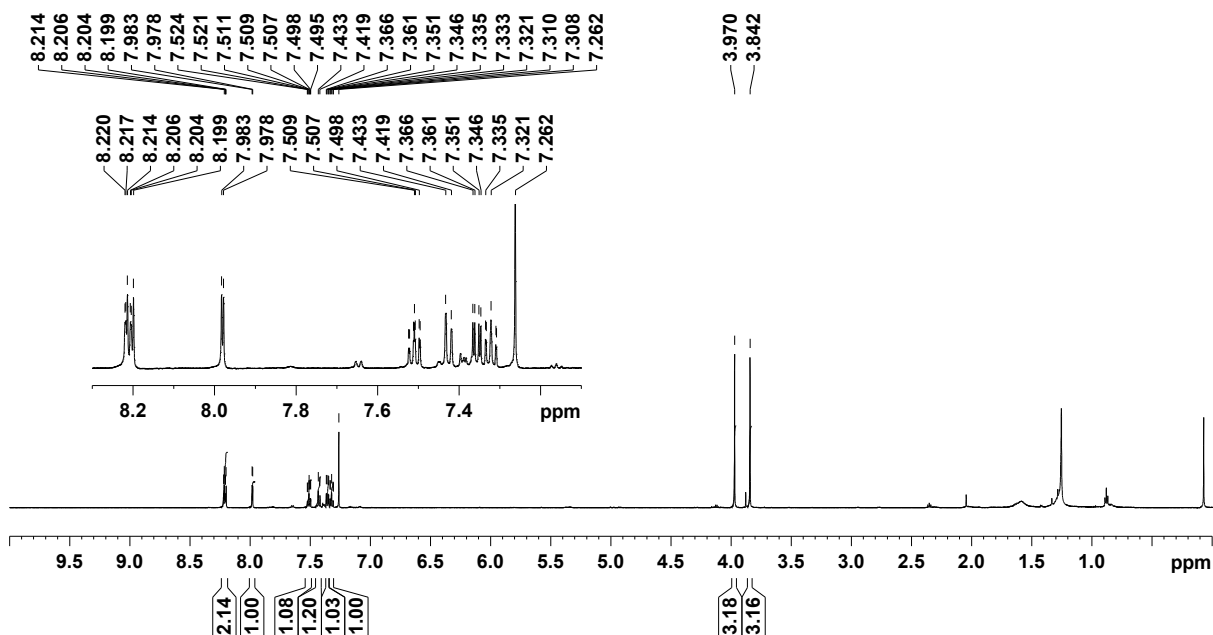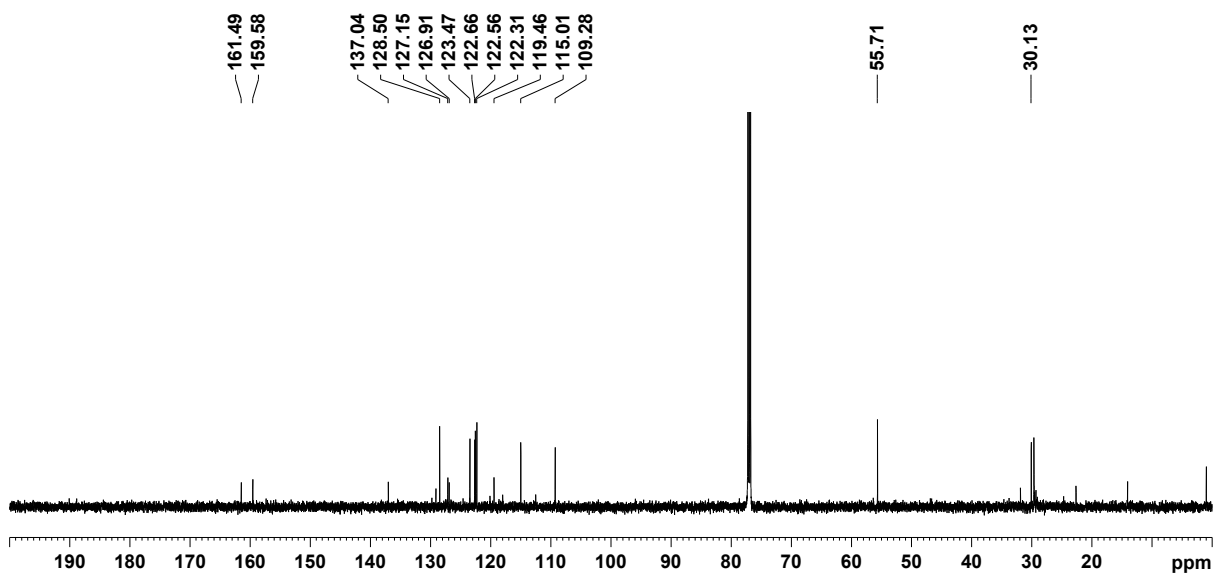

# 8-Methoxy-2-fluoro-5-methylphenanthridin-6(5H)-one (2h)

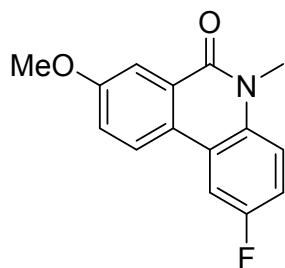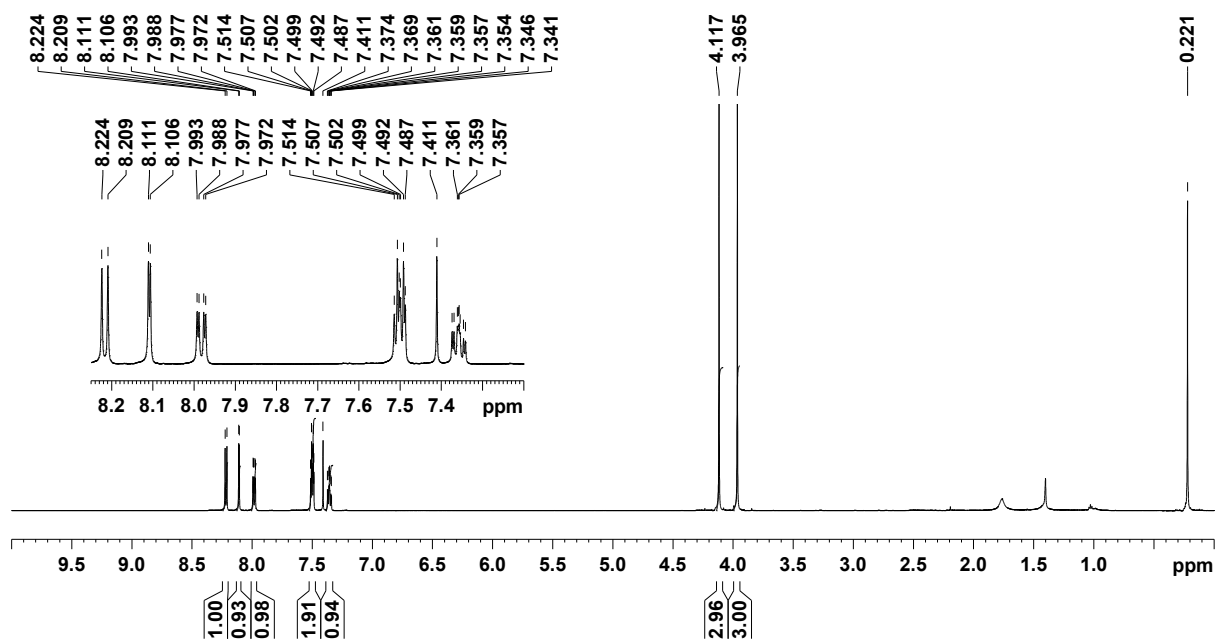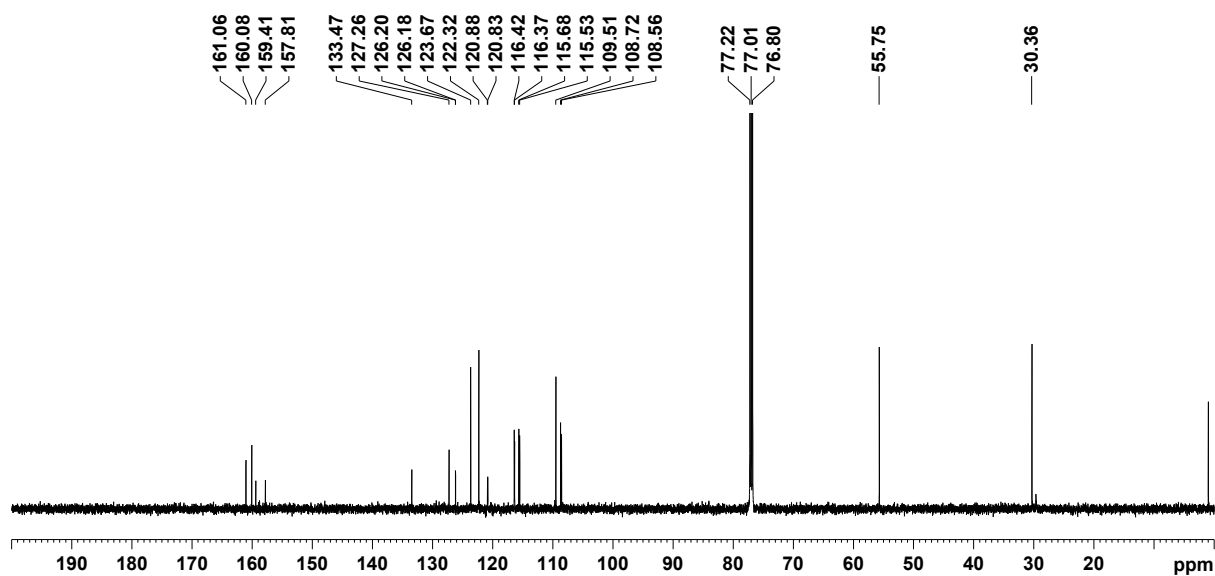

5-methyl-5H-benzo[c][1,8]naphthyridin-6-one (2j)

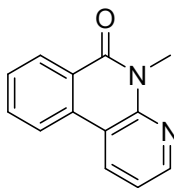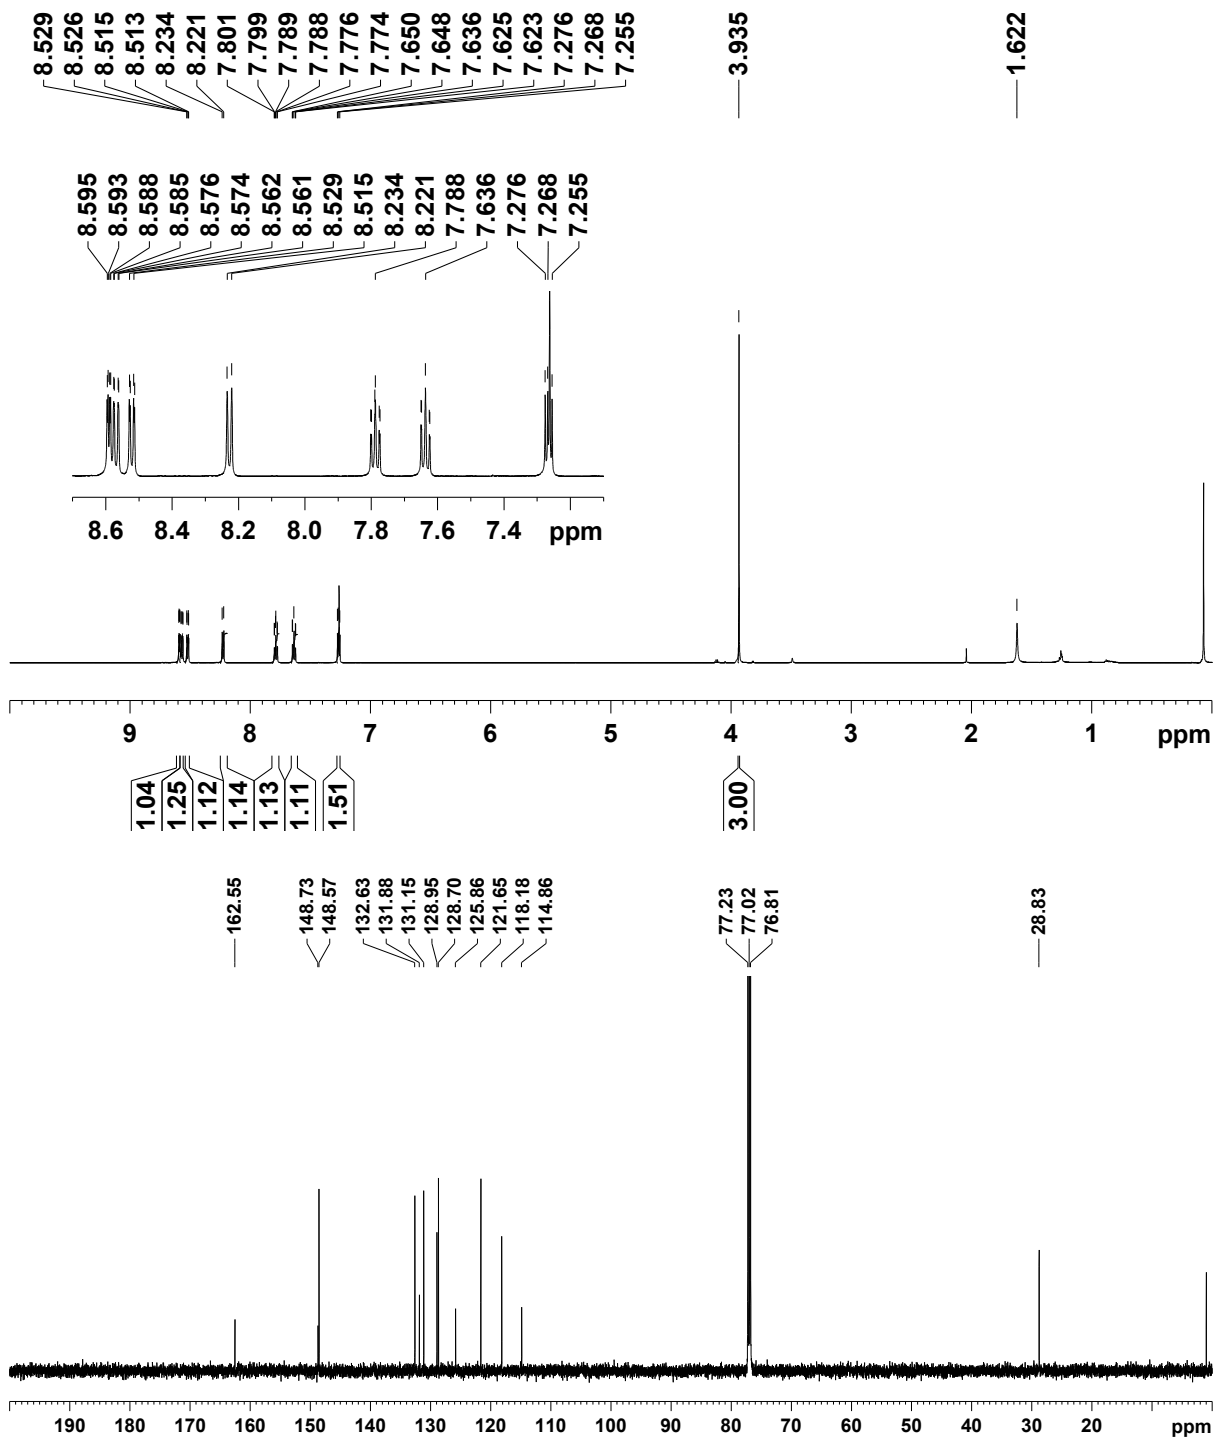

### 5-Ethylphenanthridin-6(5H)-one (2k)

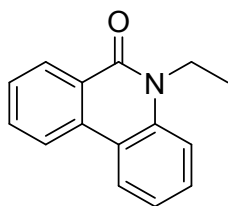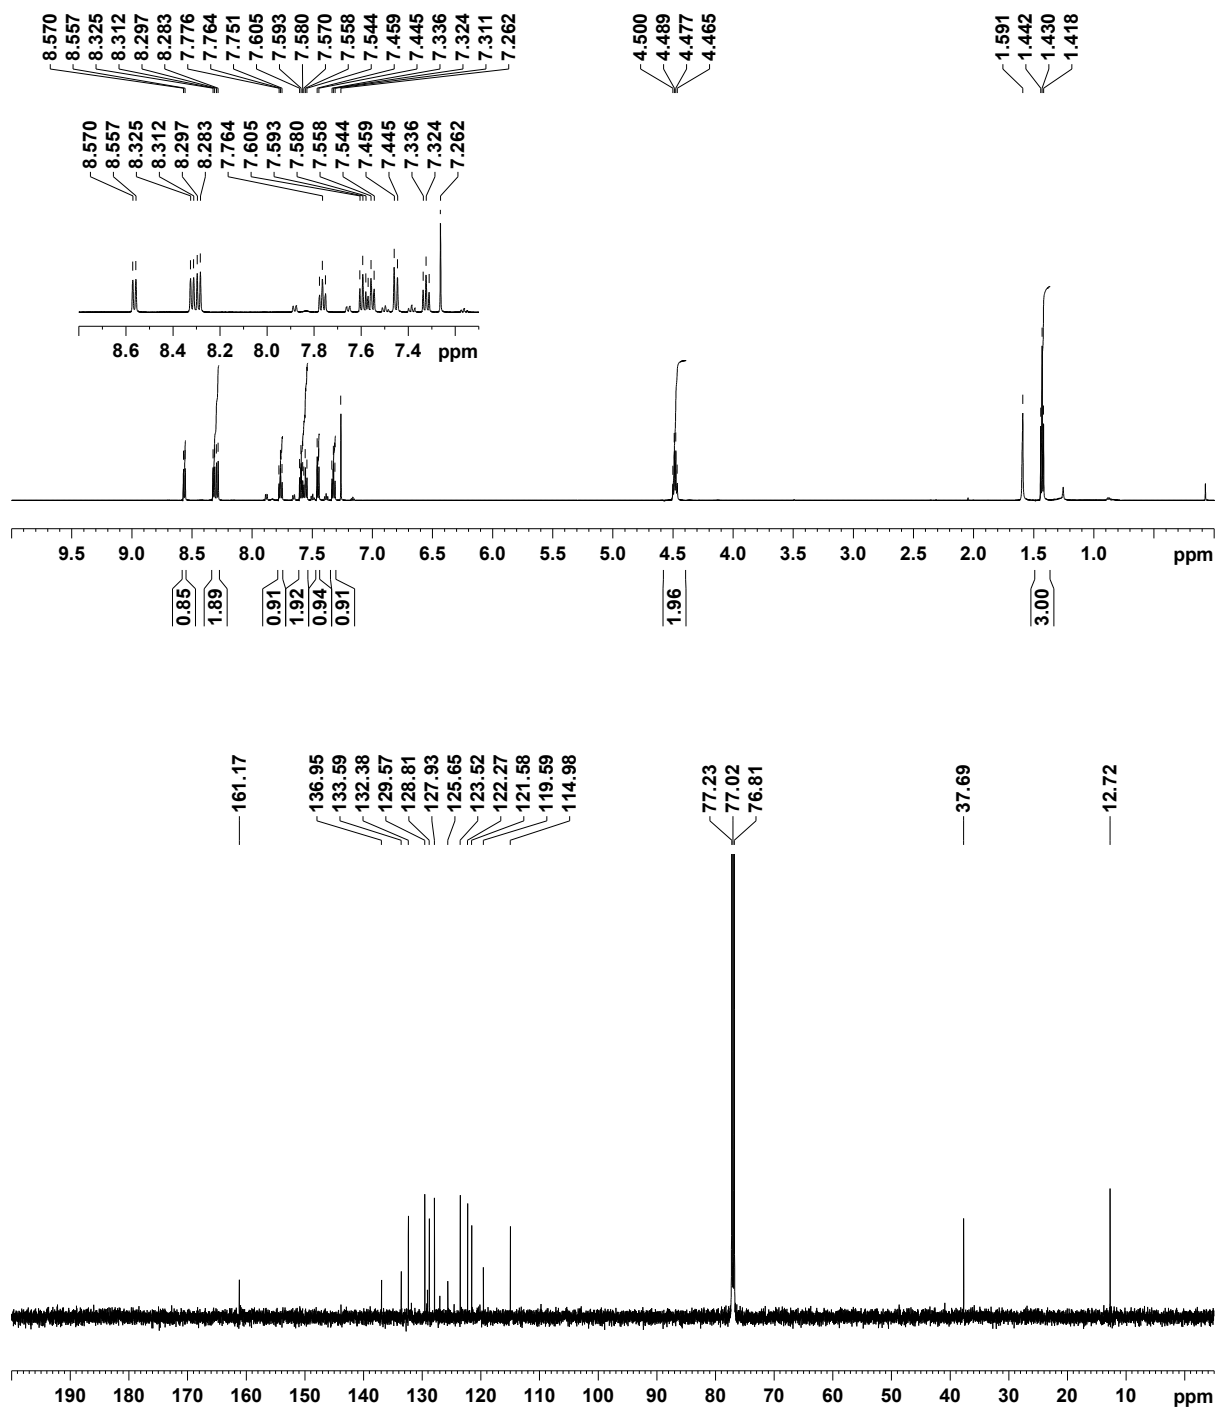



Mixture of 3,5-Dimethylphenanthridin-6(5H)-one + 1,5-Dimethylphenanthridin-6(5H)-one (2I)

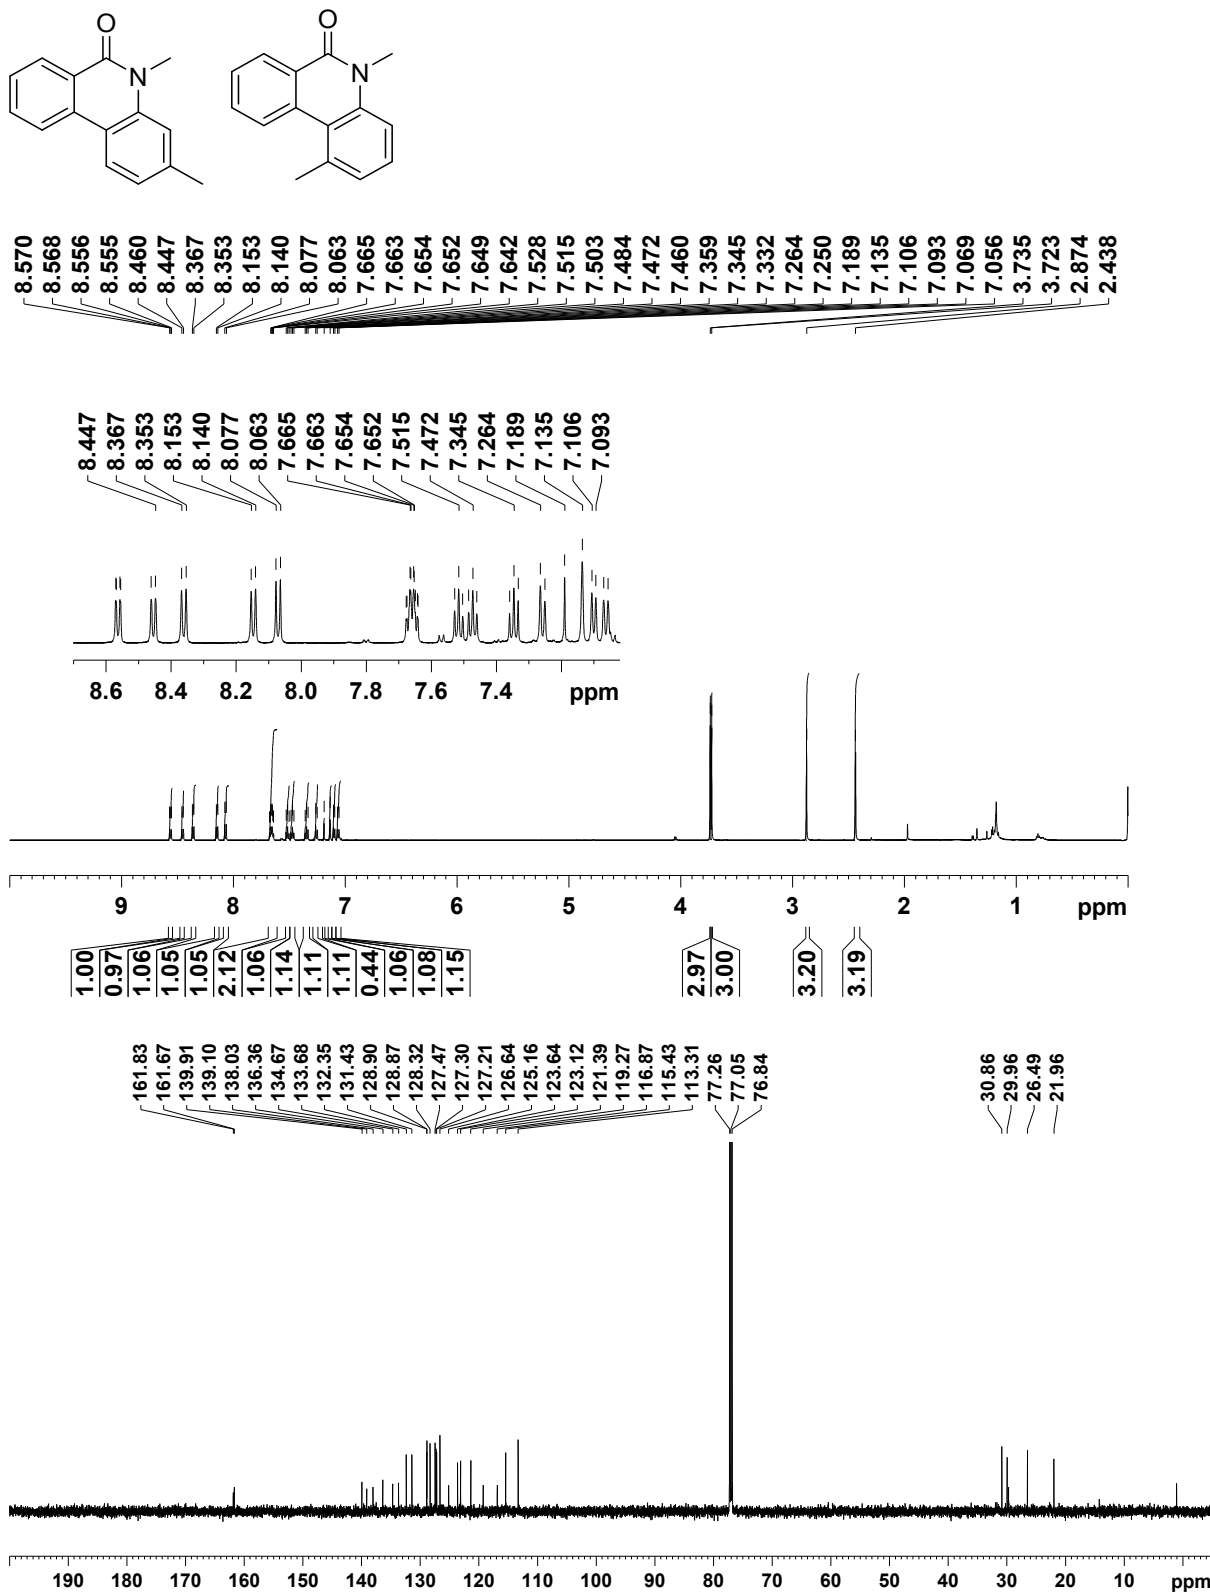

Mixture of 1-phenyl-5-methylphenanthridin-6(5H)-one + 5-Methyl-3-phenylphenanthridin-6(5H)-one (2m)

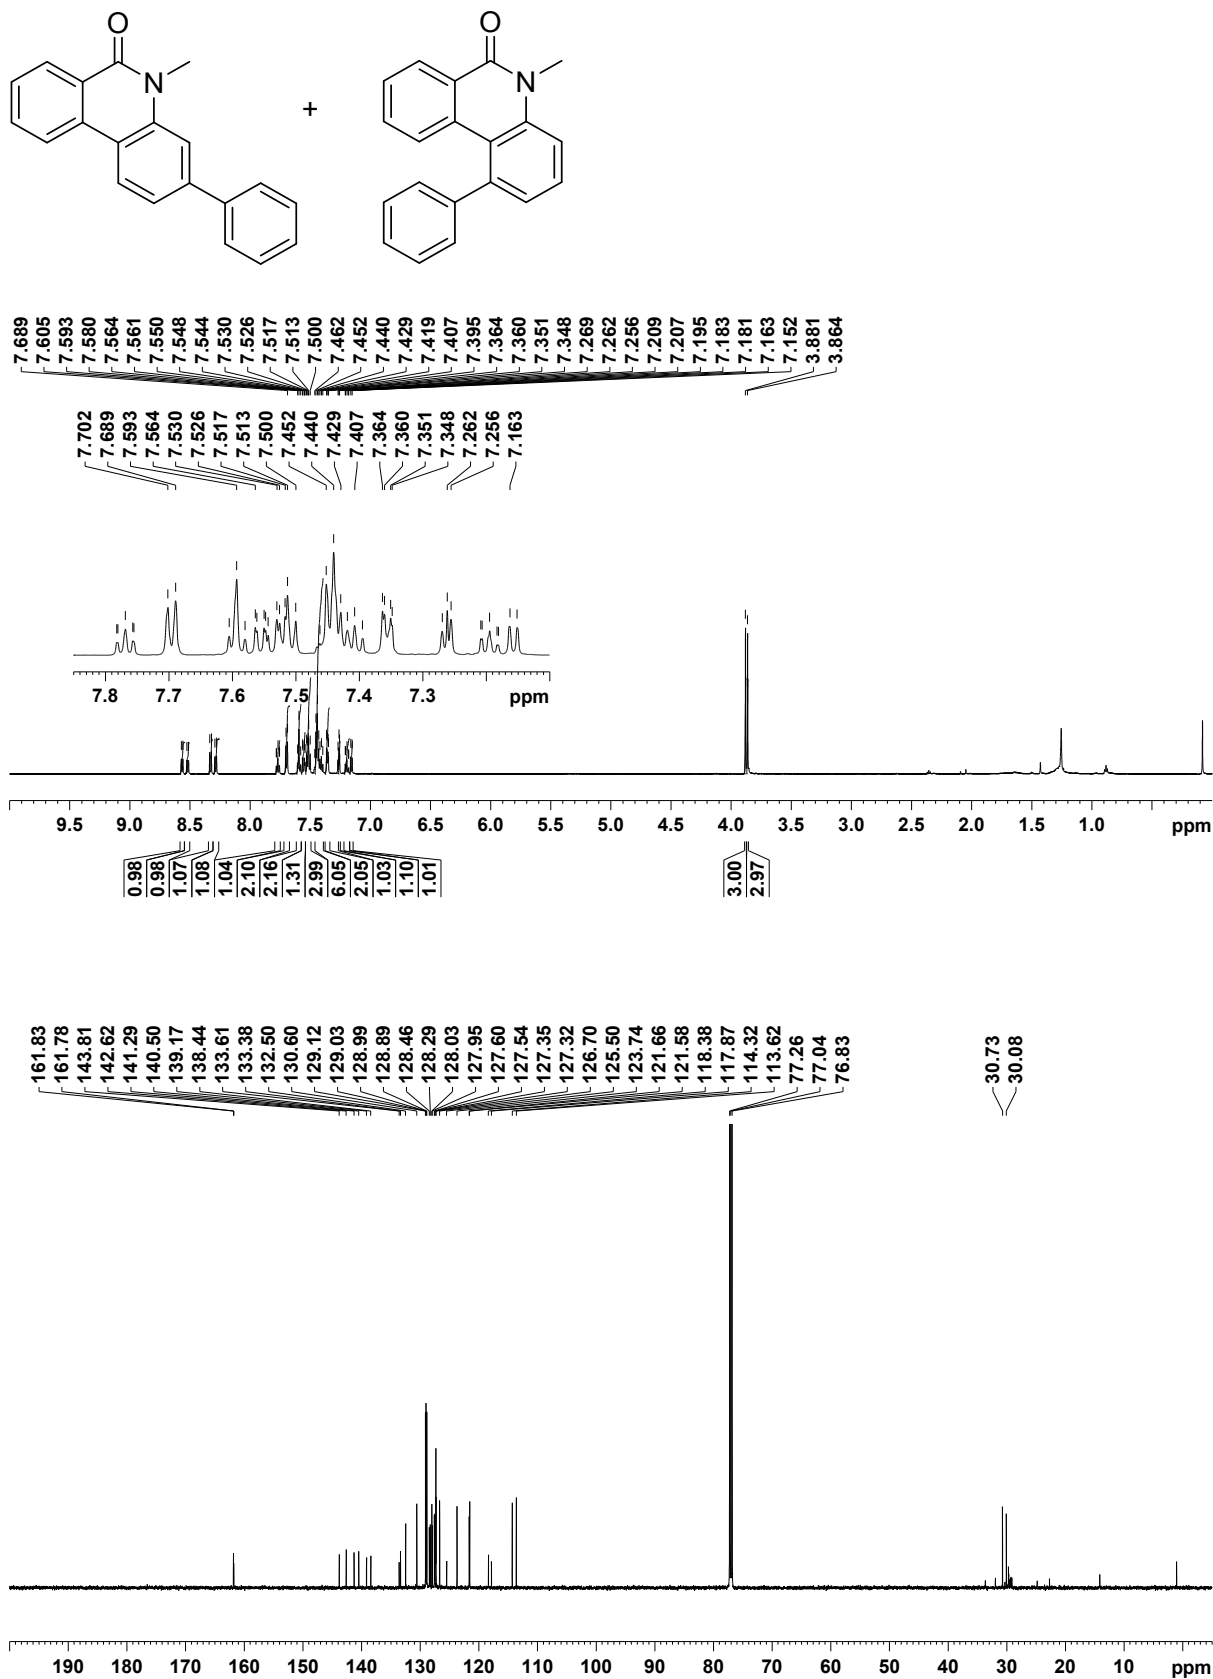

### 5-Methyl-5,6-dihydrophenanthridine (4a)

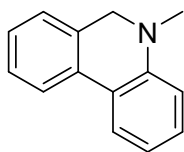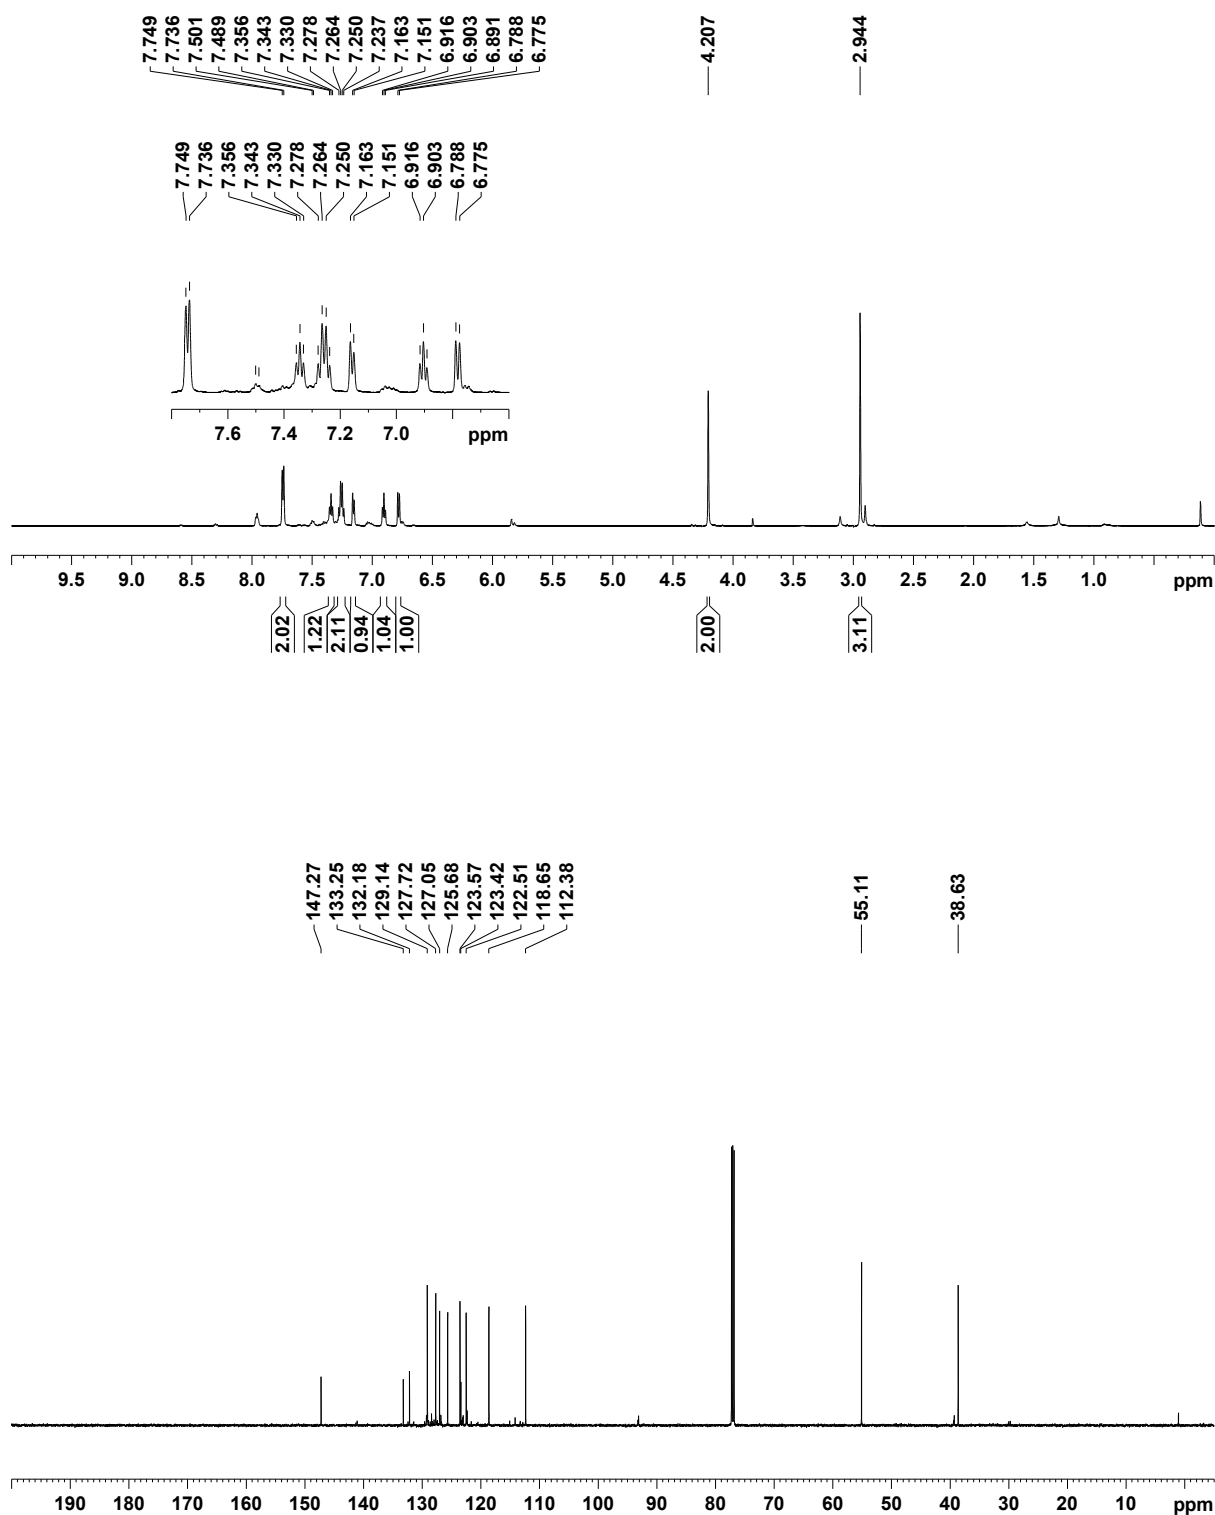

# 8,9-Dimethoxy-5-methyl-5,6-dihydrophenanthridine (4b)

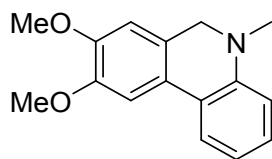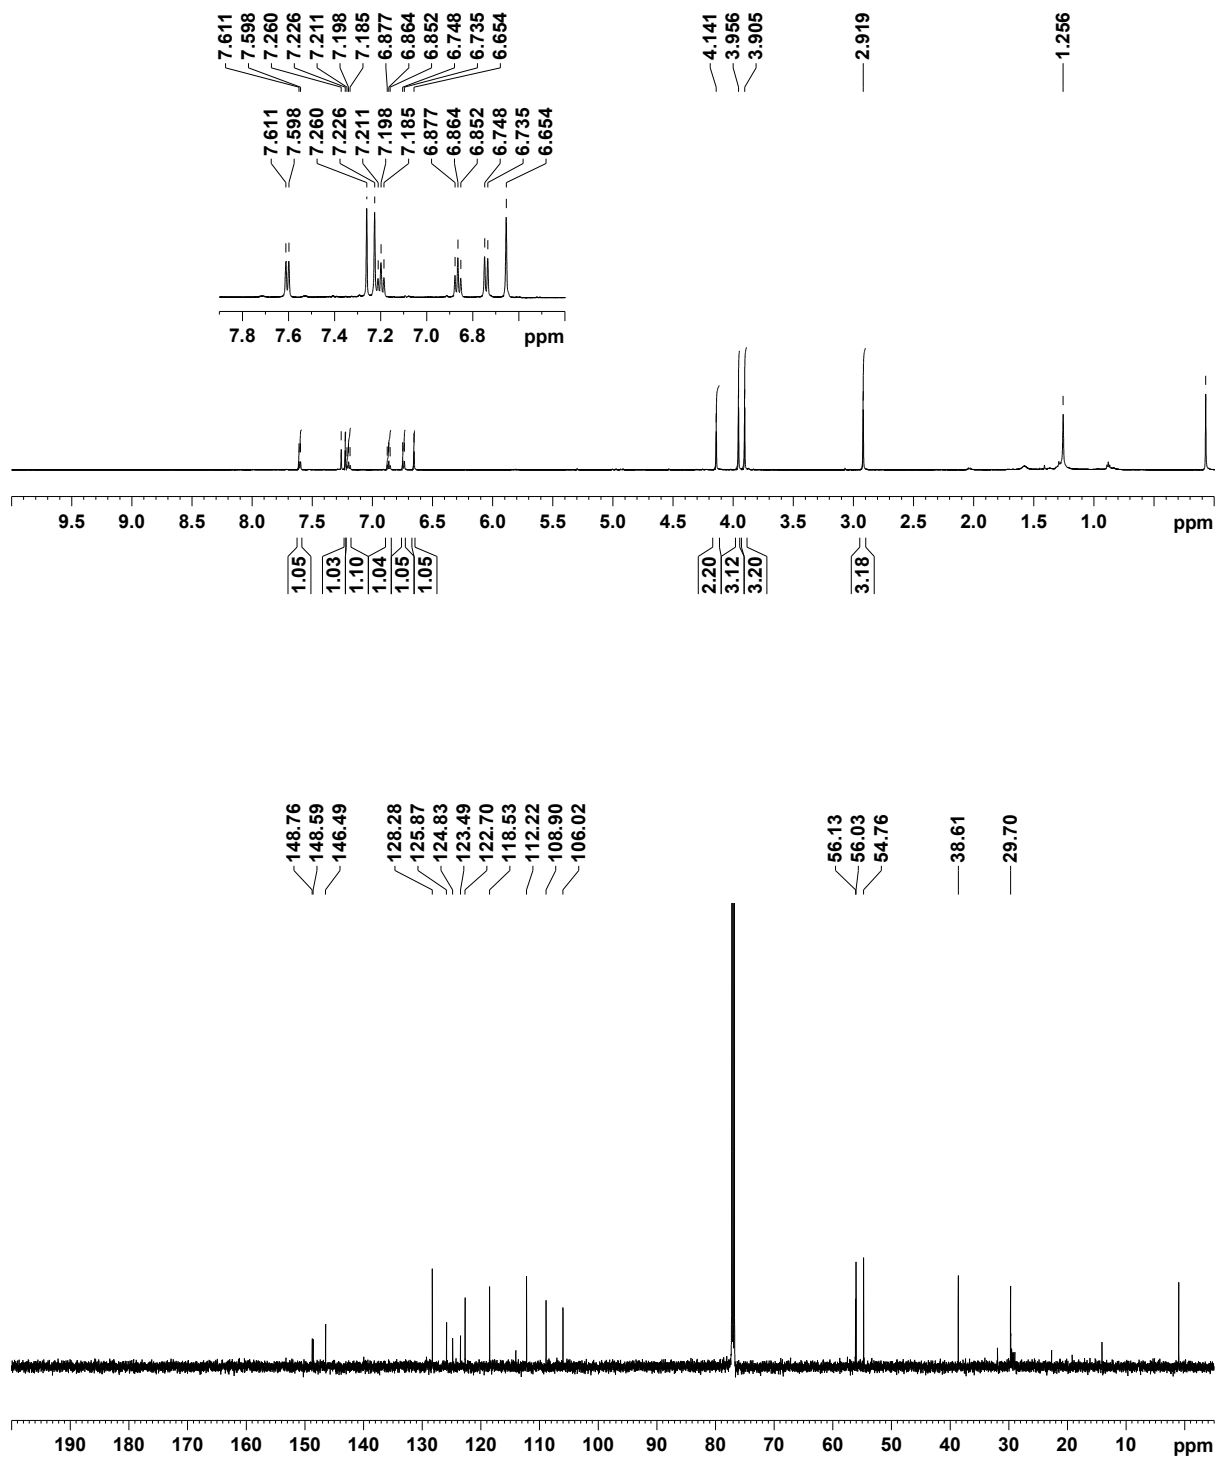

## 2-Fluoro-8,9-dimethoxy-5-methyl-5,6-dihydrophenanthridine (4c)

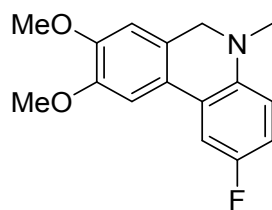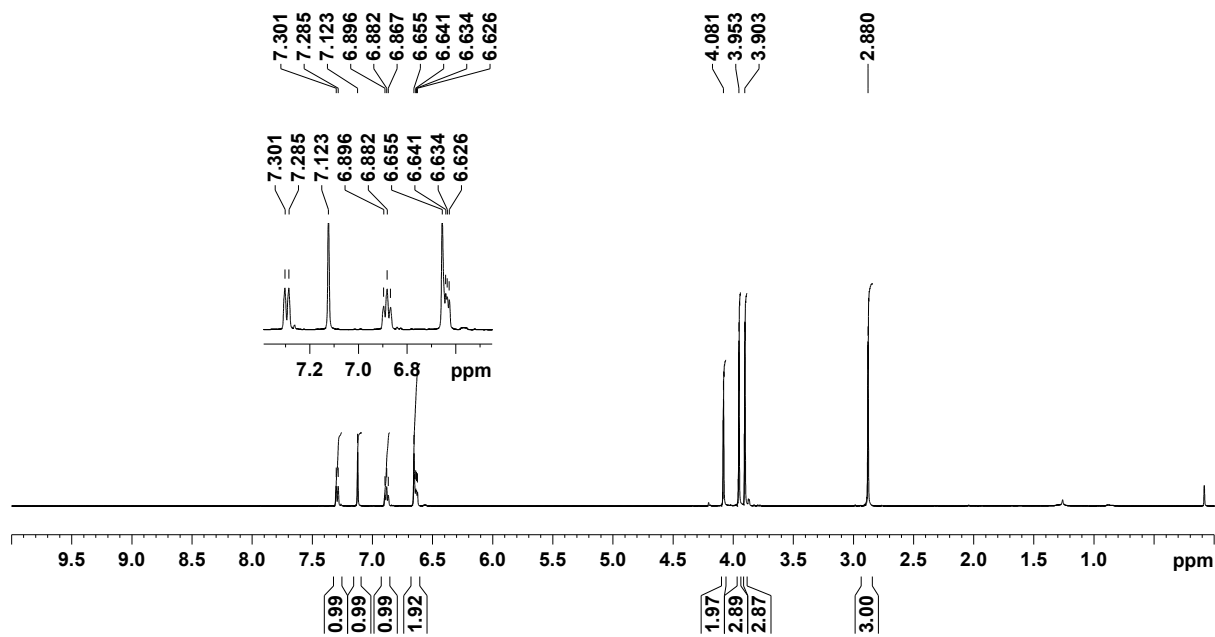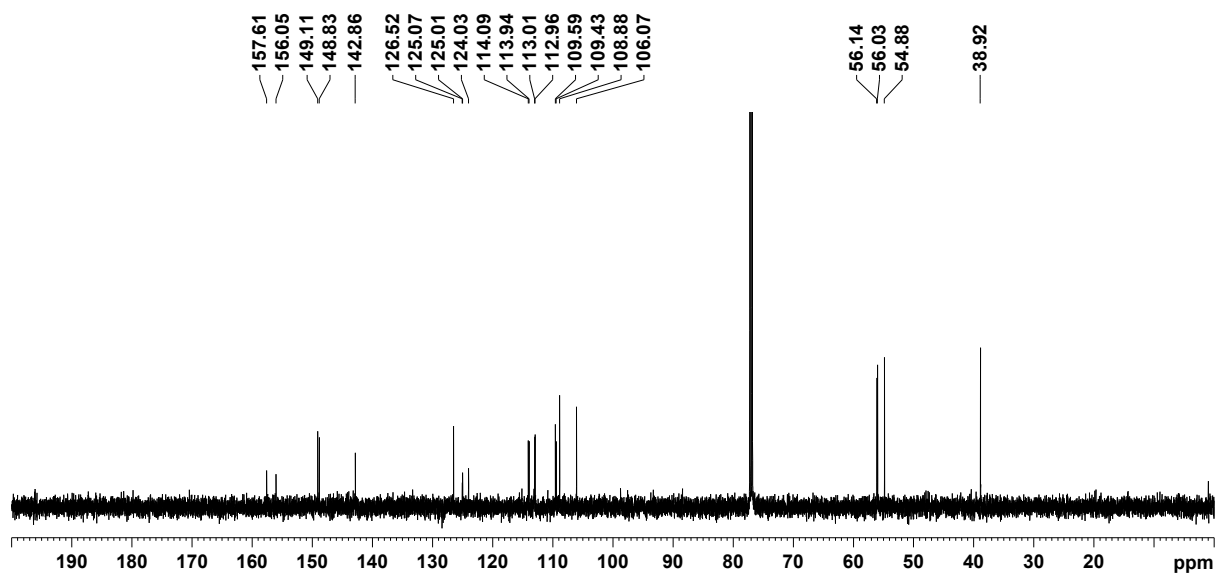

# 5,9-Dimethyl-5,6-dihydrophenanthridine (4d)

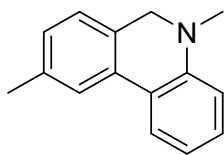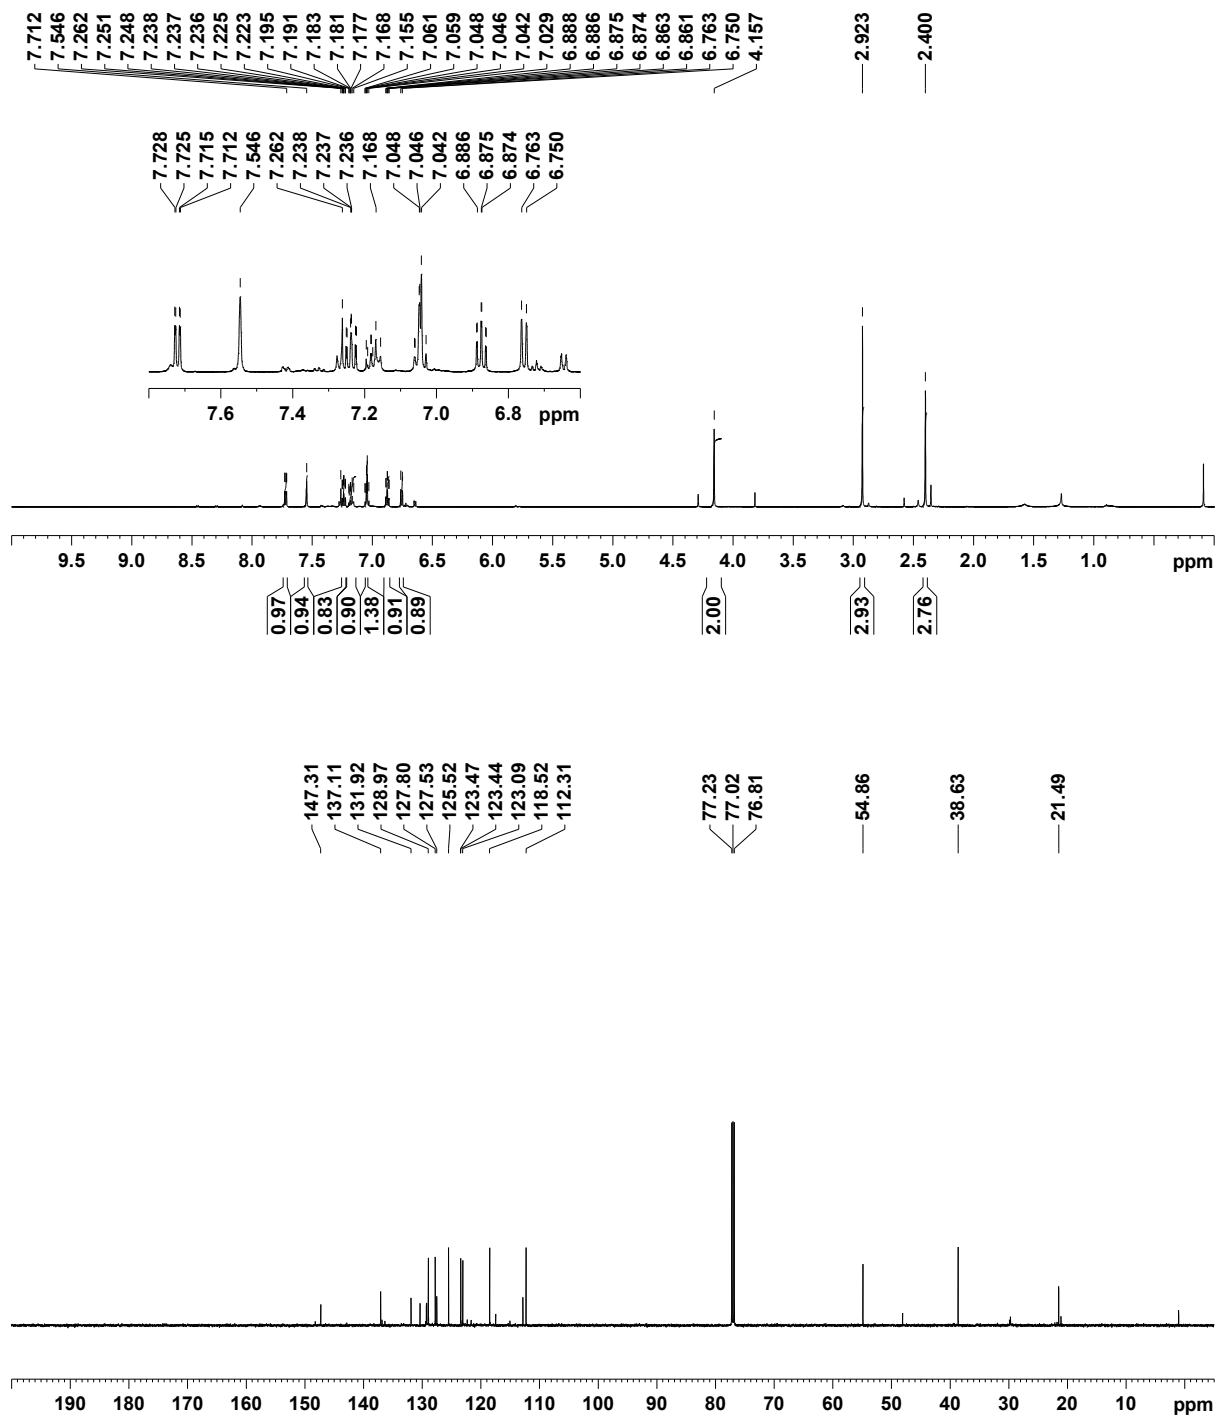

## 2-Methoxy-5,9-dimethyl-5,6-dihydrophenanthridine (4e)

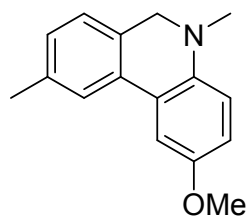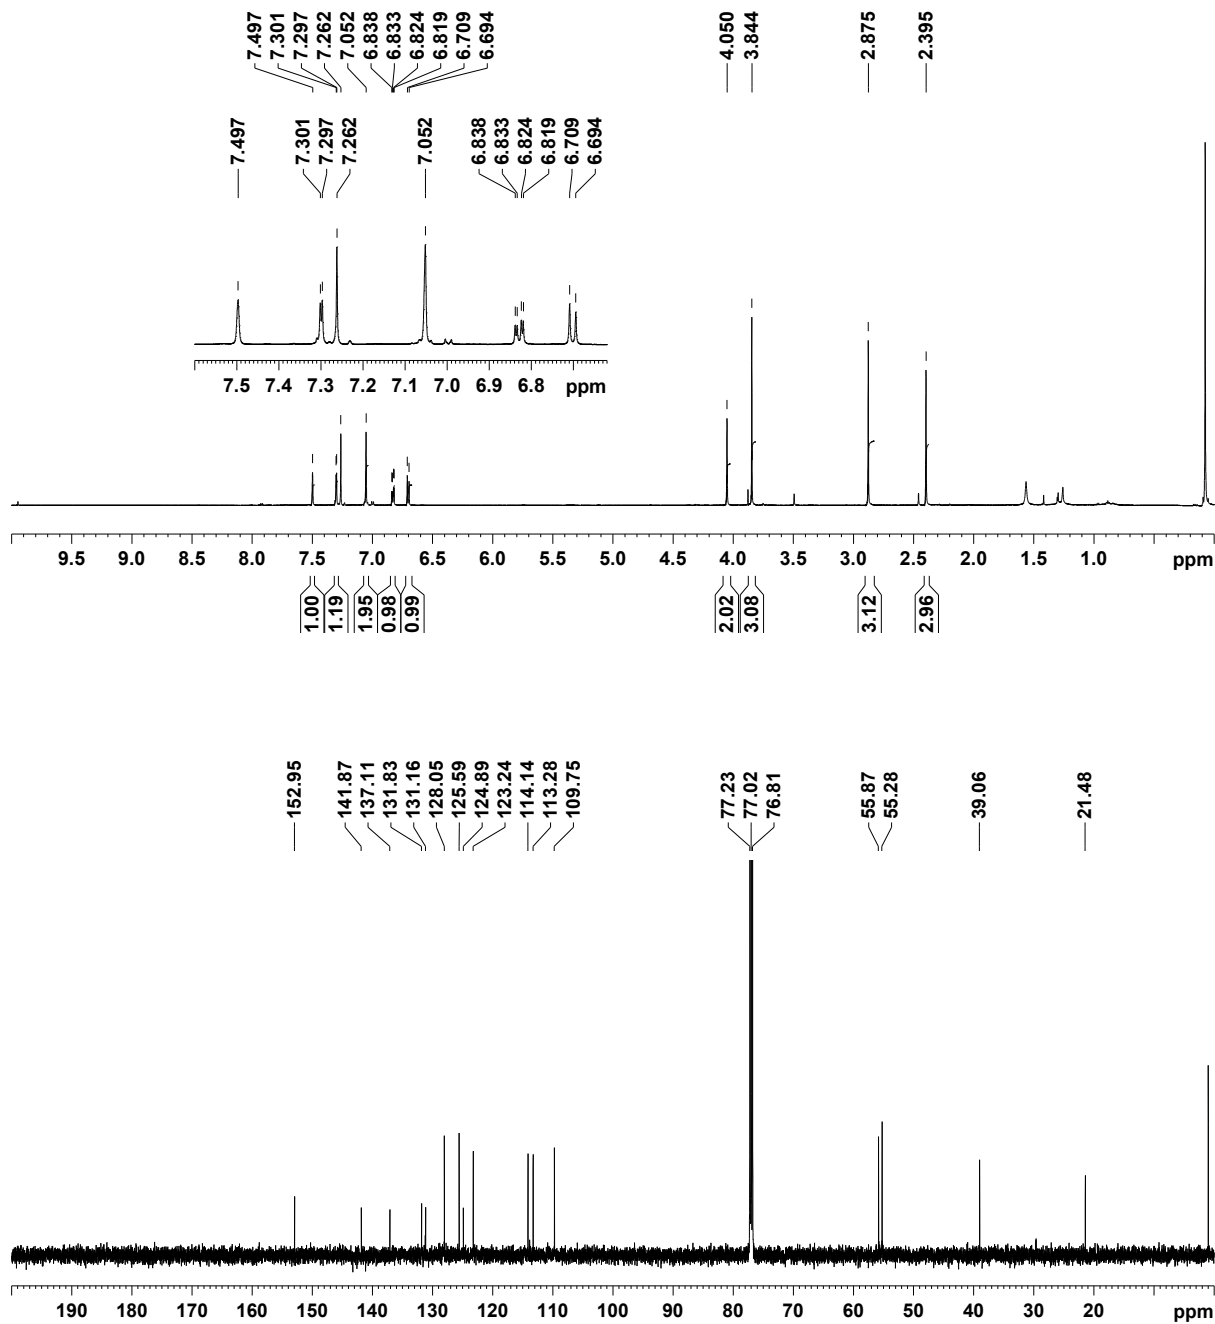

## 2,4,5-Trimethyl-5,6-dihydrophenanthridine (4f)

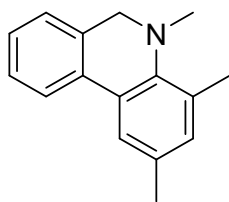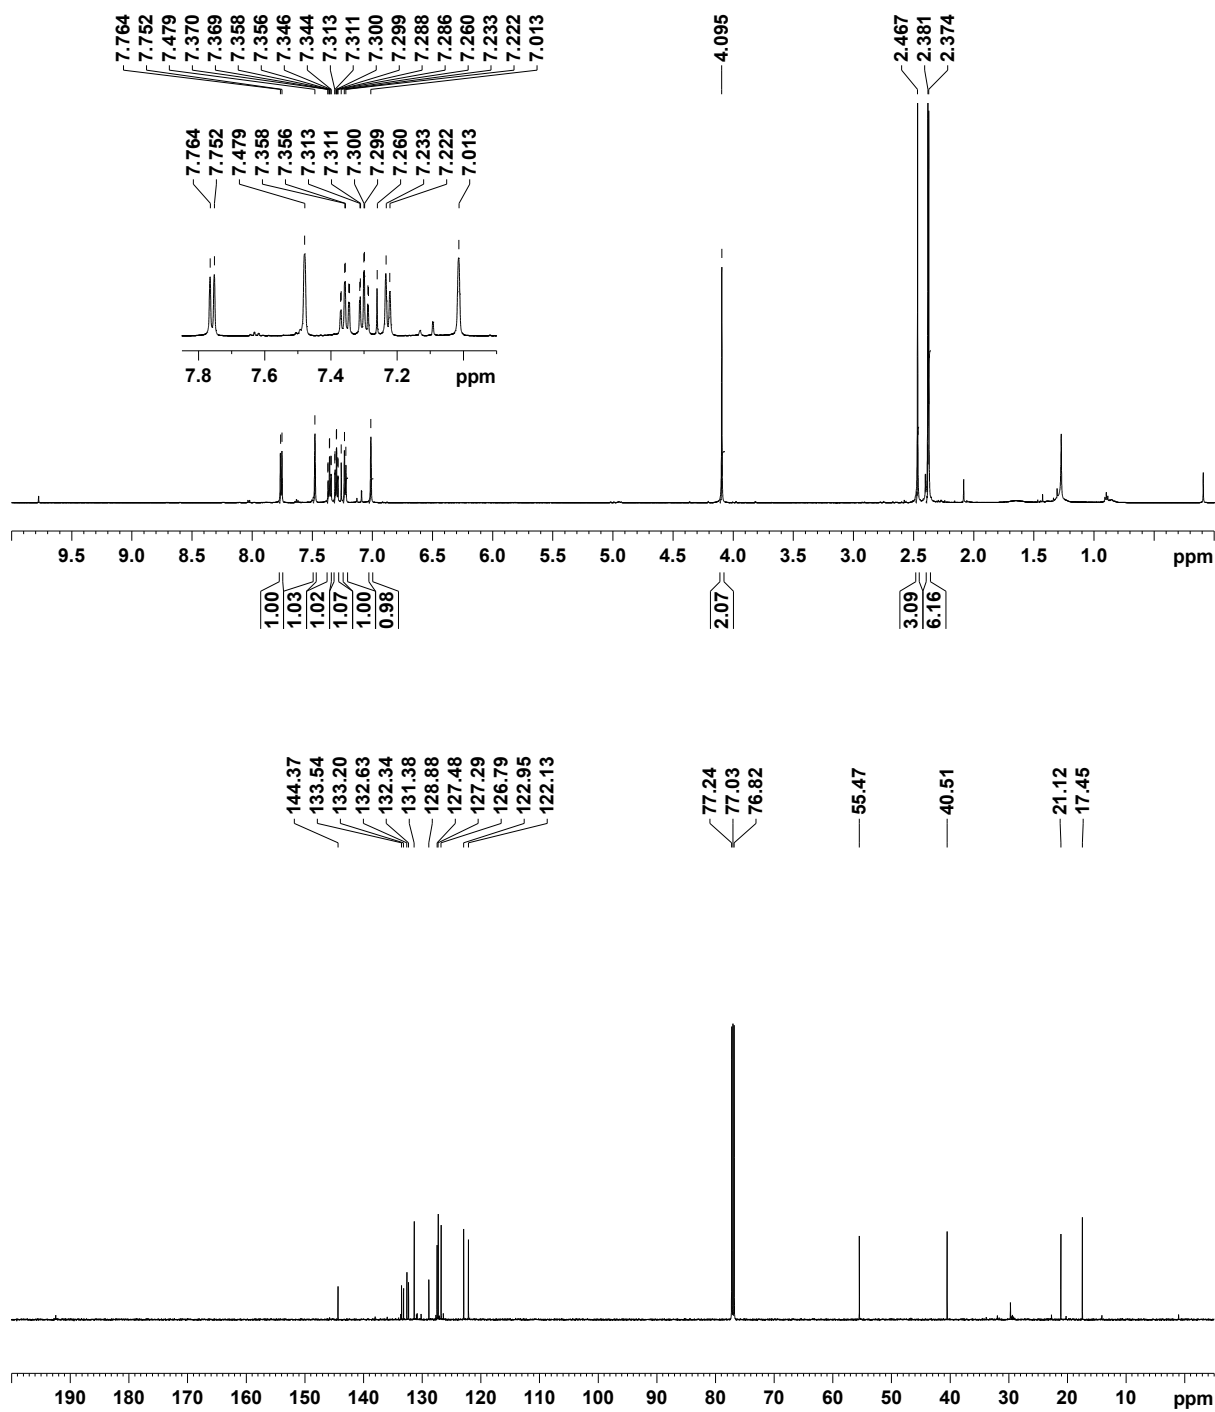



## 2-Methoxy-5-*sec*-butyl-5,6-dihydrophenanthridine (4g)

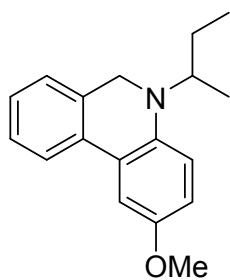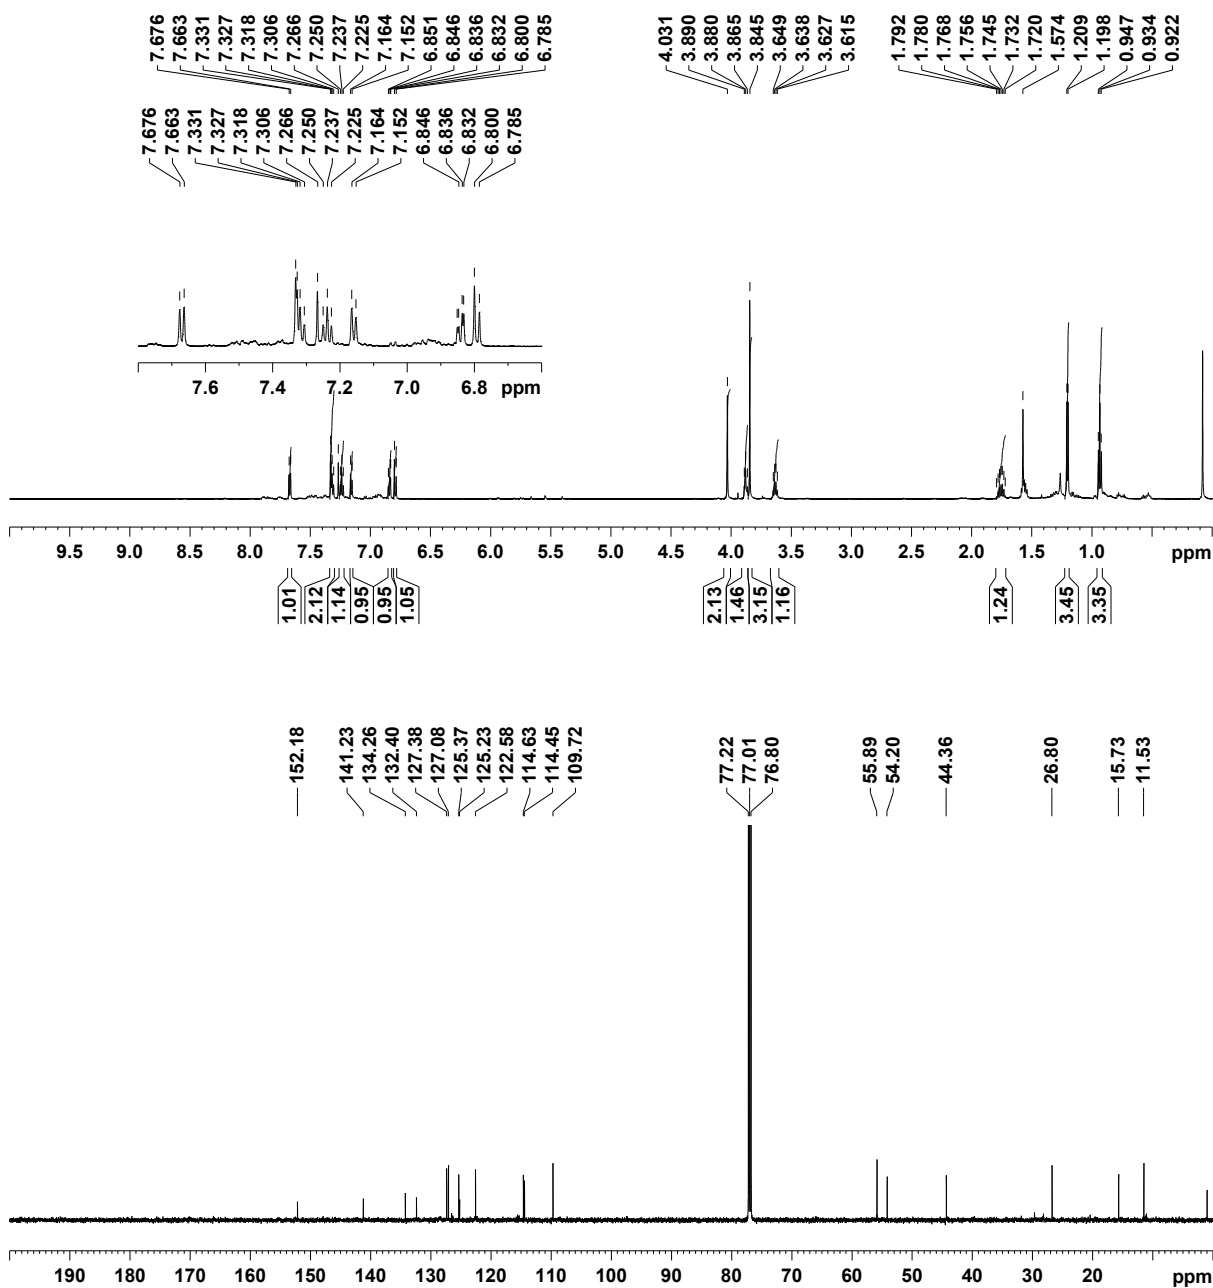

## References

1. B. S. Bhakuni, A. Kumar, S. J. Balkrishna, J. A. Sheikh, S. Konar, S. Kumar, *Org. Lett.*, 2012, **14**, 2838.
2. D. S. Roman, Y. Takahashi, A. B. Charette, *Org. Lett.*, 2011, **13**, 3242
3. C.-L. Sun, Y.-F. Gu, W.-P. Huang, Z.-J. Shi, *Chem. Commun.*, 2011, **47**, 9813.
4. C. Lu, A. V. Dubrovskiy, R. C. Larock, *J. Org. Chem.*, 2012, **77**, 8648.
5. S. Mishra, S. De, B. N. Kakde, D. Dey, A. Bisai, *Ind. J. Chem.*, 2013, **52**, 1093.
